# Supplementary material for: Single-entity coccolithophore electrochemistry shows size is no guide to the degree of calcification
Source: Royal Society of Chemistry journal article supplement (doi:10.1039/d2va00025c), 2022-01-01
Supplement: d2va00025c1.pdf [file d2va00025c1.pdf]

| <b>G.Oceanica</b> |                |              |                                       |                                   |                     |                                |                                |                                |         |
|-------------------|----------------|--------------|---------------------------------------|-----------------------------------|---------------------|--------------------------------|--------------------------------|--------------------------------|---------|
| Day               | Experiment no. | particle no. | initial $r_{\text{eff}}(\mu\text{m})$ | end $r_{\text{eff}}(\mu\text{m})$ | Dissolution time(s) | CaCO <sub>3</sub> (Rf = 4) / g | CaCO <sub>3</sub> (Rf = 2) / g | CaCO <sub>3</sub> (Rf = 6) / g |         |
| 1                 | 1              | 1            | 1                                     | 5.6                               | 3.7                 | 6.0                            | 9.1E-11                        | 6.5E-11                        | 1.0E-10 |
| 1                 | 1              | 1            | 2                                     | 6.0                               | 3.8                 | 8.8                            | 1.5E-10                        | 1.1E-10                        | 1.7E-10 |
| 1                 | 1              | 1            | 3                                     | 5.8                               | 3.9                 | 7.5                            | 1.2E-10                        | 9.0E-11                        | 1.4E-10 |
| 1                 | 1              | 1            | 4                                     | 6.7                               | 4.5                 | 8.4                            | 1.7E-10                        | 1.2E-10                        | 1.9E-10 |
| 1                 | 1              | 1            | 5                                     | 6.0                               | 4.5                 | 8.7                            | 1.6E-10                        | 1.1E-10                        | 1.8E-10 |
| 1                 | 1              | 1            | 6                                     | 5.2                               | 4.2                 | 2.2                            | 3.4E-11                        | 2.4E-11                        | 3.9E-11 |
| 1                 | 1              | 1            | 7                                     | 5.2                               | 3.7                 | 4.4                            | 6.3E-11                        | 4.5E-11                        | 7.3E-11 |
| 1                 | 1              | 1            | 8                                     | 5.7                               | 3.7                 | 7.8                            | 1.2E-10                        | 8.8E-11                        | 1.4E-10 |
| 1                 | 1              | 1            | 9                                     | 5.8                               | 3.8                 | 13.4                           | 2.1E-10                        | 1.5E-10                        | 2.4E-10 |
| 1                 | 1              | 1            | 10                                    | 5.4                               | 3.6                 | 6.9                            | 1.0E-10                        | 7.2E-11                        | 1.2E-10 |
| 1                 | 1              | 1            | 11                                    | 5.4                               | 3.5                 | 7.4                            | 1.1E-10                        | 7.8E-11                        | 1.3E-10 |
| 1                 | 2              | 1            | 1                                     | 5.7                               | 4.8                 | 2.3                            | 4.2E-11                        | 3.1E-11                        | 4.8E-11 |
| 1                 | 2              | 4            | 4                                     | 5.5                               | 4.3                 | 5.0                            | 8.1E-11                        | 5.9E-11                        | 9.3E-11 |
| 1                 | 2              | 6            | 6                                     | 6.1                               | 4.0                 | 10.1                           | 1.8E-10                        | 1.3E-10                        | 2.0E-10 |
| 1                 | 2              | 7            | 7                                     | 5.4                               | 4.4                 | 2.9                            | 4.8E-11                        | 3.4E-11                        | 5.5E-11 |
| 1                 | 2              | 8            | 8                                     | 6.1                               | 4.1                 | 8.4                            | 1.5E-10                        | 1.1E-10                        | 1.7E-10 |
| 1                 | 2              | 9            | 9                                     | 4.8                               | 3.4                 | 5.1                            | 6.5E-11                        | 4.6E-11                        | 7.6E-11 |
| 1                 | 2              | 10           | 10                                    | 5.2                               | 3.6                 | 7.1                            | 9.6E-11                        | 6.8E-11                        | 1.1E-10 |
| 1                 | 2              | 11           | 11                                    | 6.2                               | 3.9                 | 8.2                            | 1.5E-10                        | 1.1E-10                        | 1.7E-10 |
| 1                 | 2              | 12           | 12                                    | 4.9                               | 3.7                 | 2.8                            | 3.9E-11                        | 2.8E-11                        | 4.5E-11 |
| 1                 | 2              | 14           | 14                                    | 5.9                               | 4.3                 | 6.1                            | 1.1E-10                        | 8.0E-11                        | 1.2E-10 |
| 1                 | 2              | 15           | 15                                    | 6.3                               | 4.5                 | 8.8                            | 1.7E-10                        | 1.2E-10                        | 1.9E-10 |
| 1                 | 3              | 1            | 1                                     | 6.6                               | 4.9                 | 5.6                            | 1.1E-10                        | 8.5E-11                        | 1.3E-10 |
| 1                 | 3              | 2            | 2                                     | 6.8                               | 4.9                 | 6.0                            | 1.3E-10                        | 9.4E-11                        | 1.4E-10 |
| 1                 | 3              | 3            | 3                                     | 5.9                               | 4.5                 | 3.5                            | 6.2E-11                        | 4.6E-11                        | 7.1E-11 |
| 3                 | 1              | 1            | 1                                     | 5.6                               | 3.8                 | 7.7                            | 1.2E-10                        | 9.0E-11                        | 1.4E-10 |
| 3                 | 1              | 2            | 2                                     | 5.2                               | 3.5                 | 6.2                            | 8.8E-11                        | 6.3E-11                        | 1.0E-10 |
| 3                 | 1              | 3            | 3                                     | 5.3                               | 3.4                 | 8.5                            | 1.2E-10                        | 8.8E-11                        | 1.4E-10 |
| 3                 | 1              | 5            | 5                                     | 5.5                               | 3.9                 | 9.7                            | 1.5E-10                        | 1.1E-10                        | 1.7E-10 |
| 3                 | 1              | 7            | 7                                     | 5.6                               | 4.2                 | 5.9                            | 1.0E-10                        | 7.4E-11                        | 1.2E-10 |
| 3                 | 1              | 8            | 8                                     | 5.6                               | 4.1                 | 6.8                            | 1.2E-10                        | 8.4E-11                        | 1.3E-10 |
| 3                 | 1              | 9            | 9                                     | 5.7                               | 3.8                 | 10.1                           | 1.7E-10                        | 1.2E-10                        | 1.9E-10 |
| 3                 | 1              | 10           | 10                                    | 5.5                               | 3.8                 | 7.0                            | 1.1E-10                        | 8.0E-11                        | 1.3E-10 |
| 3                 | 1              | 13           | 13                                    | 5.4                               | 4.3                 | 6.3                            | 1.0E-10                        | 7.5E-11                        | 1.2E-10 |
| 3                 | 1              | 14           | 14                                    | 5.2                               | 3.1                 | 5.4                            | 7.2E-11                        | 5.1E-11                        | 8.3E-11 |

|   |   |    |     |     |      |         |         |         |
|---|---|----|-----|-----|------|---------|---------|---------|
| 3 | 1 | 15 | 4.9 | 3.7 | 6.7  | 9.5E-11 | 6.8E-11 | 1.1E-10 |
| 3 | 1 | 16 | 5.1 | 3.7 | 6.4  | 9.3E-11 | 6.6E-11 | 1.1E-10 |
| 3 | 1 | 17 | 5.4 | 3.5 | 7.8  | 1.2E-10 | 8.8E-11 | 1.4E-10 |
| 3 | 3 | 2  | 5.8 | 3.9 | 5.5  | 9.4E-11 | 6.9E-11 | 1.1E-10 |
| 3 | 3 | 4  | 5.9 | 3.3 | 7.1  | 1.2E-10 | 8.4E-11 | 1.3E-10 |
| 3 | 3 | 5  | 4.6 | 4.0 | 0.5  | 6.8E-12 | 4.8E-12 | 7.9E-12 |
| 3 | 3 | 6  | 5.6 | 3.6 | 6.3  | 1.0E-10 | 7.3E-11 | 1.2E-10 |
| 3 | 3 | 7  | 5.5 | 3.8 | 5.8  | 9.2E-11 | 6.7E-11 | 1.1E-10 |
| 3 | 3 | 8  | 5.9 | 3.6 | 5.7  | 9.2E-11 | 6.6E-11 | 1.1E-10 |
| 3 | 3 | 9  | 5.2 | 3.4 | 5.8  | 8.1E-11 | 5.8E-11 | 9.4E-11 |
| 3 | 3 | 10 | 5.1 | 3.1 | 5.2  | 6.9E-11 | 4.9E-11 | 8.0E-11 |
| 3 | 3 | 11 | 4.8 | 3.9 | 2.4  | 3.3E-11 | 2.4E-11 | 3.9E-11 |
| 3 | 3 | 12 | 6.4 | 4.0 | 6.2  | 1.1E-10 | 8.5E-11 | 1.3E-10 |
| 3 | 3 | 13 | 5.5 | 3.5 | 6.2  | 9.6E-11 | 6.9E-11 | 1.1E-10 |
| 5 | 1 | 1  | 4.9 | 3.8 | 4.4  | 6.1E-11 | 4.3E-11 | 7.1E-11 |
| 5 | 1 | 3  | 6.2 | 4.8 | 8.7  | 1.7E-10 | 1.2E-10 | 1.9E-10 |
| 5 | 1 | 4  | 5.1 | 3.2 | 5.6  | 7.3E-11 | 5.2E-11 | 8.5E-11 |
| 5 | 1 | 9  | 5.2 | 3.5 | 8.1  | 1.1E-10 | 8.2E-11 | 1.3E-10 |
| 5 | 1 | 11 | 4.9 | 3.2 | 6.5  | 8.7E-11 | 6.2E-11 | 1.0E-10 |
| 5 | 1 | 12 | 5.8 | 3.5 | 8.0  | 1.3E-10 | 9.2E-11 | 1.5E-10 |
| 5 | 1 | 13 | 4.8 | 3.8 | 3.5  | 4.8E-11 | 3.4E-11 | 5.6E-11 |
| 5 | 1 | 14 | 5.3 | 3.6 | 7.7  | 1.1E-10 | 8.2E-11 | 1.3E-10 |
| 5 | 1 | 16 | 5.3 | 3.8 | 6.9  | 1.0E-10 | 7.5E-11 | 1.2E-10 |
| 5 | 1 | 17 | 3.2 | 2.9 | 1.4  | 1.2E-11 | 8.0E-12 | 1.4E-11 |
| 5 | 1 | 20 | 5.2 | 3.2 | 9.0  | 1.2E-10 | 8.7E-11 | 1.4E-10 |
| 5 | 1 | 21 | 5.9 | 3.6 | 11.9 | 1.9E-10 | 1.4E-10 | 2.2E-10 |
| 5 | 1 | 22 | 4.7 | 3.5 | 2.7  | 3.5E-11 | 2.5E-11 | 4.1E-11 |
| 5 | 2 | 6  | 4.9 | 3.4 | 4.7  | 6.4E-11 | 4.6E-11 | 7.5E-11 |
| 5 | 2 | 11 | 5.2 | 3.6 | 10.4 | 1.5E-10 | 1.1E-10 | 1.8E-10 |
| 5 | 2 | 12 | 5.8 | 3.9 | 11.0 | 1.9E-10 | 1.4E-10 | 2.1E-10 |
| 5 | 2 | 13 | 5.5 | 3.8 | 8.5  | 1.3E-10 | 9.2E-11 | 1.5E-10 |
| 5 | 2 | 14 | 5.2 | 3.6 | 9.3  | 1.4E-10 | 1.0E-10 | 1.6E-10 |
| 5 | 2 | 15 | 5.0 | 3.4 | 9.9  | 1.4E-10 | 9.7E-11 | 1.6E-10 |
| 5 | 2 | 17 | 5.3 | 3.4 | 11.8 | 1.7E-10 | 1.2E-10 | 2.0E-10 |
| 5 | 2 | 19 | 5.0 | 3.7 | 7.2  | 1.0E-10 | 7.5E-11 | 1.2E-10 |
| 5 | 2 | 20 | 5.5 | 3.7 | 9.4  | 1.5E-10 | 1.1E-10 | 1.7E-10 |
| 5 | 2 | 22 | 4.1 | 3.7 | 0.6  | 7.2E-12 | 5.0E-12 | 8.4E-12 |

|   |   |    |     |     |      |         |         |         |
|---|---|----|-----|-----|------|---------|---------|---------|
| 5 | 2 | 23 | 5.3 | 3.3 | 8.8  | 1.3E-10 | 9.3E-11 | 1.5E-10 |
| 5 | 2 | 24 | 5.0 | 3.3 | 7.6  | 1.0E-10 | 7.1E-11 | 1.2E-10 |
| 5 | 2 | 25 | 5.9 | 3.3 | 9.4  | 1.5E-10 | 1.1E-10 | 1.7E-10 |
| 7 | 1 | 7  | 5.1 | 2.9 | 9.5  | 1.2E-10 | 8.8E-11 | 1.4E-10 |
| 7 | 1 | 8  | 5.0 | 3.7 | 4.1  | 5.6E-11 | 4.0E-11 | 6.5E-11 |
| 7 | 1 | 9  | 4.9 | 3.5 | 7.6  | 9.9E-11 | 6.9E-11 | 1.1E-10 |
| 7 | 1 | 11 | 5.4 | 4.3 | 7.2  | 1.2E-10 | 8.3E-11 | 1.3E-10 |
| 7 | 1 | 13 | 5.1 | 3.6 | 8.6  | 1.2E-10 | 8.7E-11 | 1.4E-10 |
| 7 | 1 | 14 | 5.2 | 3.4 | 9.1  | 1.3E-10 | 9.4E-11 | 1.5E-10 |
| 7 | 1 | 20 | 4.9 | 3.6 | 10.4 | 1.4E-10 | 1.0E-10 | 1.7E-10 |
| 7 | 1 | 22 | 5.1 | 3.4 | 9.3  | 1.3E-10 | 9.4E-11 | 1.5E-10 |
| 7 | 1 | 23 | 5.6 | 3.6 | 14.9 | 2.3E-10 | 1.7E-10 | 2.7E-10 |
| 7 | 1 | 24 | 5.2 | 3.4 | 11.2 | 1.6E-10 | 1.1E-10 | 1.8E-10 |
| 7 | 1 | 33 | 5.1 | 4.2 | 6.5  | 1.0E-10 | 7.2E-11 | 1.2E-10 |
| 7 | 2 | 1  | 5.5 | 3.6 | 11.4 | 1.8E-10 | 1.3E-10 | 2.1E-10 |
| 7 | 2 | 2  | 4.6 | 3.0 | 9.1  | 1.1E-10 | 7.3E-11 | 1.2E-10 |
| 7 | 2 | 3  | 5.1 | 3.5 | 10.8 | 1.5E-10 | 1.1E-10 | 1.7E-10 |
| 7 | 2 | 4  | 5.1 | 3.1 | 12.0 | 1.6E-10 | 1.1E-10 | 1.9E-10 |
| 7 | 2 | 5  | 5.4 | 3.6 | 15.0 | 2.2E-10 | 1.6E-10 | 2.5E-10 |
| 7 | 2 | 6  | 4.4 | 3.0 | 8.6  | 9.6E-11 | 6.7E-11 | 1.1E-10 |
| 7 | 2 | 7  | 4.9 | 3.3 | 13.1 | 1.7E-10 | 1.2E-10 | 2.0E-10 |
| 7 | 2 | 8  | 5.0 | 3.8 | 11.3 | 1.6E-10 | 1.2E-10 | 1.9E-10 |
| 7 | 2 | 10 | 4.0 | 3.0 | 6.4  | 6.5E-11 | 4.4E-11 | 7.7E-11 |
| 7 | 2 | 12 | 5.3 | 3.4 | 17.6 | 2.6E-10 | 1.9E-10 | 3.0E-10 |
| 7 | 2 | 23 | 5.2 | 3.4 | 16.7 | 2.4E-10 | 1.7E-10 | 2.8E-10 |
| 7 | 2 | 24 | 5.4 | 3.5 | 11.4 | 1.7E-10 | 1.2E-10 | 2.0E-10 |
| 7 | 2 | 25 | 5.0 | 3.7 | 10.9 | 1.5E-10 | 1.1E-10 | 1.8E-10 |
| 7 | 2 | 26 | 5.1 | 3.3 | 17.9 | 2.6E-10 | 1.8E-10 | 3.0E-10 |
| 7 | 2 | 29 | 5.2 | 3.4 | 13.1 | 1.9E-10 | 1.3E-10 | 2.2E-10 |
| 7 | 2 | 44 | 4.7 | 3.1 | 9.1  | 1.1E-10 | 7.8E-11 | 1.3E-10 |
| 7 | 2 | 45 | 5.4 | 3.2 | 17.5 | 2.6E-10 | 1.9E-10 | 3.0E-10 |
| 9 | 1 | 1  | 5.0 | 4.4 | 4.5  | 7.0E-11 | 5.0E-11 | 8.1E-11 |
| 9 | 1 | 9  | 5.2 | 3.5 | 7.2  | 1.0E-10 | 7.3E-11 | 1.2E-10 |
| 9 | 1 | 11 | 5.6 | 3.8 | 9.1  | 1.4E-10 | 1.0E-10 | 1.7E-10 |
| 9 | 1 | 12 | 5.6 | 3.7 | 10.8 | 1.8E-10 | 1.3E-10 | 2.0E-10 |
| 9 | 1 | 17 | 5.0 | 3.3 | 6.8  | 8.8E-11 | 6.2E-11 | 1.0E-10 |
| 9 | 1 | 18 | 5.7 | 3.3 | 19.9 | 2.4E-10 | 1.7E-10 | 2.9E-10 |

|    |   |    |     |     |      |         |         |         |
|----|---|----|-----|-----|------|---------|---------|---------|
| 9  | 1 | 20 | 4.4 | 3.7 | 4.1  | 5.1E-11 | 3.5E-11 | 5.9E-11 |
| 9  | 2 | 1  | 5.8 | 4.3 | 12.4 | 2.1E-10 | 1.5E-10 | 2.4E-10 |
| 9  | 2 | 2  | 6.5 | 4.6 | 18.6 | 3.7E-10 | 2.8E-10 | 4.2E-10 |
| 9  | 2 | 4  | 5.8 | 4.2 | 12.2 | 2.1E-10 | 1.5E-10 | 2.4E-10 |
| 9  | 2 | 5  | 5.9 | 4.3 | 8.5  | 1.4E-10 | 1.0E-10 | 1.6E-10 |
| 9  | 2 | 6  | 5.7 | 3.9 | 13.0 | 2.1E-10 | 1.5E-10 | 2.4E-10 |
| 9  | 2 | 7  | 5.3 | 3.4 | 13.4 | 1.9E-10 | 1.3E-10 | 2.2E-10 |
| 9  | 2 | 8  | 4.9 | 2.9 | 19.7 | 2.1E-10 | 1.4E-10 | 2.5E-10 |
| 9  | 2 | 9  | 5.0 | 3.3 | 14.6 | 2.0E-10 | 1.5E-10 | 2.4E-10 |
| 9  | 2 | 11 | 5.4 | 3.7 | 7.8  | 1.1E-10 | 8.0E-11 | 1.3E-10 |
| 9  | 2 | 14 | 5.3 | 4.1 | 5.5  | 8.4E-11 | 6.0E-11 | 9.7E-11 |
| 9  | 2 | 15 | 5.7 | 3.4 | 19.7 | 2.7E-10 | 1.9E-10 | 3.1E-10 |
| 9  | 2 | 16 | 5.4 | 3.8 | 11.5 | 1.8E-10 | 1.3E-10 | 2.0E-10 |
| 9  | 2 | 17 | 5.0 | 3.5 | 5.7  | 7.5E-11 | 5.3E-11 | 8.7E-11 |
| 9  | 2 | 22 | 5.2 | 3.5 | 6.9  | 9.4E-11 | 6.6E-11 | 1.1E-10 |
| 9  | 2 | 23 | 5.6 | 4.2 | 9.6  | 1.6E-10 | 1.2E-10 | 1.8E-10 |
| 9  | 2 | 24 | 5.4 | 3.2 | 19.4 | 2.6E-10 | 1.8E-10 | 3.0E-10 |
| 9  | 2 | 25 | 4.5 | 3.5 | 7.1  | 8.1E-11 | 5.6E-11 | 9.5E-11 |
| 9  | 2 | 26 | 5.2 | 3.6 | 8.7  | 1.3E-10 | 9.0E-11 | 1.5E-10 |
| 9  | 2 | 28 | 4.6 | 3.3 | 4.4  | 5.4E-11 | 3.8E-11 | 6.3E-11 |
| 9  | 2 | 29 | 4.5 | 2.7 | 19.1 | 1.7E-10 | 1.2E-10 | 2.1E-10 |
| 9  | 2 | 30 | 5.5 | 3.6 | 13.4 | 2.0E-10 | 1.5E-10 | 2.3E-10 |
| 9  | 2 | 33 | 5.9 | 4.2 | 10.0 | 1.7E-10 | 1.3E-10 | 2.0E-10 |
| 11 | 3 | 1  | 5.7 | 4.3 | 3.4  | 5.7E-11 | 4.1E-11 | 6.5E-11 |
| 11 | 3 | 2  | 5.0 | 4.4 | 1.6  | 2.4E-11 | 1.7E-11 | 2.8E-11 |
| 11 | 3 | 3  | 5.4 | 4.5 | 3.3  | 5.4E-11 | 3.9E-11 | 6.2E-11 |
| 11 | 3 | 4  | 4.6 | 3.6 | 3.6  | 4.6E-11 | 3.2E-11 | 5.4E-11 |
| 11 | 3 | 5  | 5.4 | 4.3 | 3.9  | 6.3E-11 | 4.6E-11 | 7.2E-11 |
| 11 | 3 | 7  | 6.2 | 4.8 | 5.5  | 1.0E-10 | 7.6E-11 | 1.2E-10 |
| 11 | 3 | 8  | 5.4 | 3.9 | 5.3  | 8.2E-11 | 5.9E-11 | 9.4E-11 |
| 11 | 3 | 9  | 5.8 | 4.8 | 3.6  | 6.5E-11 | 4.7E-11 | 7.4E-11 |
| 11 | 3 | 10 | 5.2 | 3.8 | 4.8  | 7.1E-11 | 5.1E-11 | 8.2E-11 |
| 11 | 3 | 11 | 5.6 | 4.2 | 7.2  | 1.1E-10 | 8.1E-11 | 1.3E-10 |
| 11 | 3 | 12 | 5.8 | 4.2 | 5.5  | 9.4E-11 | 6.8E-11 | 1.1E-10 |
| 11 | 3 | 14 | 6.0 | 4.3 | 6.5  | 1.2E-10 | 8.5E-11 | 1.3E-10 |
| 11 | 3 | 15 | 5.8 | 4.2 | 5.9  | 9.9E-11 | 7.2E-11 | 1.1E-10 |
| 11 | 3 | 16 | 4.5 | 4.2 | 0.5  | 6.9E-12 | 4.9E-12 | 8.0E-12 |

|    |   |    |     |     |      |         |         |         |
|----|---|----|-----|-----|------|---------|---------|---------|
| 11 | 3 | 18 | 5.8 | 4.2 | 5.9  | 1.0E-10 | 7.3E-11 | 1.1E-10 |
| 13 | 1 | 1  | 5.0 | 3.9 | 4.0  | 5.8E-11 | 4.1E-11 | 6.7E-11 |
| 13 | 1 | 3  | 6.2 | 5.0 | 3.3  | 6.5E-11 | 4.8E-11 | 7.3E-11 |
| 13 | 1 | 4  | 4.9 | 3.9 | 4.2  | 6.0E-11 | 4.2E-11 | 6.9E-11 |
| 13 | 1 | 10 | 5.5 | 4.4 | 3.4  | 5.6E-11 | 4.1E-11 | 6.5E-11 |
| 13 | 1 | 11 | 5.3 | 4.4 | 2.8  | 4.6E-11 | 3.3E-11 | 5.3E-11 |
| 13 | 1 | 12 | 5.4 | 4.2 | 4.2  | 6.8E-11 | 4.9E-11 | 7.8E-11 |
| 13 | 1 | 13 | 5.9 | 5.0 | 3.7  | 7.0E-11 | 5.1E-11 | 7.9E-11 |
| 13 | 1 | 14 | 5.7 | 4.4 | 4.2  | 7.2E-11 | 5.3E-11 | 8.3E-11 |
| 13 | 1 | 16 | 5.4 | 4.0 | 4.0  | 6.1E-11 | 4.4E-11 | 7.1E-11 |
| 13 | 1 | 17 | 5.6 | 4.3 | 3.9  | 6.5E-11 | 4.7E-11 | 7.4E-11 |
| 13 | 2 | 1  | 6.9 | 5.5 | 3.7  | 8.4E-11 | 6.3E-11 | 9.4E-11 |
| 13 | 2 | 2  | 6.1 | 4.9 | 2.3  | 4.4E-11 | 3.2E-11 | 5.0E-11 |
| 13 | 2 | 3  | 5.4 | 3.6 | 4.9  | 7.0E-11 | 5.0E-11 | 8.1E-11 |
| 13 | 2 | 4  | 5.8 | 4.8 | 2.8  | 5.0E-11 | 3.7E-11 | 5.7E-11 |
| 13 | 2 | 5  | 5.6 | 4.6 | 2.5  | 4.4E-11 | 3.2E-11 | 5.0E-11 |
| 13 | 2 | 7  | 5.5 | 4.2 | 4.8  | 7.4E-11 | 5.3E-11 | 8.6E-11 |
| 13 | 2 | 8  | 5.6 | 4.3 | 2.7  | 4.5E-11 | 3.3E-11 | 5.2E-11 |
| 13 | 2 | 9  | 5.8 | 5.0 | 2.4  | 4.5E-11 | 3.3E-11 | 5.1E-11 |
| 13 | 2 | 10 | 4.8 | 3.4 | 3.6  | 4.7E-11 | 3.3E-11 | 5.4E-11 |
| 15 | 1 | 1  | 6.9 | 5.5 | 3.7  | 8.4E-11 | 6.3E-11 | 9.4E-11 |
| 15 | 1 | 2  | 6.1 | 4.9 | 2.3  | 4.4E-11 | 3.2E-11 | 5.0E-11 |
| 15 | 1 | 3  | 5.4 | 3.6 | 4.9  | 7.0E-11 | 5.0E-11 | 8.1E-11 |
| 15 | 1 | 4  | 5.8 | 4.8 | 2.8  | 5.0E-11 | 3.7E-11 | 5.7E-11 |
| 15 | 1 | 5  | 5.6 | 4.6 | 2.5  | 4.4E-11 | 3.2E-11 | 5.0E-11 |
| 15 | 1 | 7  | 5.5 | 4.2 | 4.8  | 7.4E-11 | 5.3E-11 | 8.6E-11 |
| 15 | 1 | 8  | 5.6 | 4.3 | 2.7  | 4.5E-11 | 3.3E-11 | 5.2E-11 |
| 15 | 1 | 9  | 5.8 | 5.0 | 2.4  | 4.5E-11 | 3.3E-11 | 5.1E-11 |
| 15 | 1 | 10 | 4.8 | 3.4 | 3.6  | 4.7E-11 | 3.3E-11 | 5.4E-11 |
| 15 | 2 | 4  | 5.8 | 4.8 | 18.6 | 3.4E-10 | 2.5E-10 | 3.9E-10 |
| 15 | 2 | 14 | 4.4 | 3.9 | 16.8 | 2.2E-10 | 1.5E-10 | 2.5E-10 |
| 15 | 2 | 15 | 6.3 | 6.0 | 4.6  | 1.0E-10 | 7.7E-11 | 1.2E-10 |
| 15 | 2 | 19 | 5.3 | 4.8 | 12.8 | 2.2E-10 | 1.6E-10 | 2.5E-10 |
| 15 | 2 | 23 | 4.9 | 4.0 | 18.6 | 2.7E-10 | 1.9E-10 | 3.1E-10 |
| 15 | 2 | 25 | 4.7 | 4.1 | 9.7  | 1.3E-10 | 9.4E-11 | 1.5E-10 |
| 15 | 2 | 28 | 4.8 | 4.2 | 13.6 | 2.0E-10 | 1.4E-10 | 2.3E-10 |
| 15 | 2 | 46 | 4.4 | 4.0 | 12.1 | 1.6E-10 | 1.1E-10 | 1.8E-10 |

|    |   |    |     |     |      |         |         |         |
|----|---|----|-----|-----|------|---------|---------|---------|
| 15 | 2 | 47 | 4.4 | 4.0 | 9.9  | 1.3E-10 | 9.2E-11 | 1.5E-10 |
| 15 | 2 | 53 | 5.8 | 5.6 | 3.7  | 7.3E-11 | 5.4E-11 | 8.3E-11 |
| 15 | 2 | 57 | 4.6 | 4.3 | 2.6  | 3.7E-11 | 2.6E-11 | 4.3E-11 |
| 15 | 2 | 69 | 5.9 | 5.3 | 17.0 | 3.3E-10 | 2.4E-10 | 3.8E-10 |
| 15 | 2 | 70 | 5.4 | 5.3 | 7.1  | 1.3E-10 | 9.6E-11 | 1.5E-10 |
| 15 | 2 | 73 | 4.7 | 4.3 | 13.1 | 1.9E-10 | 1.3E-10 | 2.2E-10 |
| 15 | 2 | 84 | 4.7 | 4.4 | 9.5  | 1.4E-10 | 1.0E-10 | 1.6E-10 |
| 15 | 3 | 2  | 4.7 | 4.1 | 1.6  | 2.2E-11 | 1.6E-11 | 2.6E-11 |
| 15 | 3 | 5  | 5.9 | 4.2 | 5.9  | 1.0E-10 | 7.5E-11 | 1.2E-10 |
| 15 | 3 | 6  | 4.6 | 3.8 | 2.2  | 2.9E-11 | 2.0E-11 | 3.4E-11 |
| 15 | 3 | 8  | 5.1 | 3.8 | 5.0  | 7.2E-11 | 5.1E-11 | 8.3E-11 |
| 15 | 3 | 9  | 5.2 | 4.0 | 5.4  | 8.3E-11 | 5.9E-11 | 9.5E-11 |
| 15 | 3 | 11 | 6.1 | 4.6 | 3.6  | 6.7E-11 | 4.9E-11 | 7.6E-11 |
| 15 | 3 | 13 | 5.3 | 3.7 | 6.1  | 8.9E-11 | 6.3E-11 | 1.0E-10 |
| 15 | 3 | 15 | 4.7 | 3.0 | 4.9  | 5.7E-11 | 4.0E-11 | 6.7E-11 |
| 15 | 3 | 16 | 5.3 | 4.1 | 4.4  | 6.7E-11 | 4.8E-11 | 7.8E-11 |
| 15 | 3 | 17 | 5.6 | 4.1 | 8.3  | 1.4E-10 | 1.0E-10 | 1.6E-10 |
| 15 | 3 | 18 | 5.7 | 4.2 | 7.1  | 1.2E-10 | 8.8E-11 | 1.4E-10 |
| 15 | 3 | 19 | 4.8 | 3.5 | 4.8  | 6.2E-11 | 4.3E-11 | 7.2E-11 |
| 15 | 3 | 20 | 5.0 | 3.7 | 4.1  | 5.6E-11 | 4.0E-11 | 6.5E-11 |
| 17 | 1 | 4  | 5.4 | 5.2 | 0.3  | 5.4E-12 | 4.0E-12 | 6.2E-12 |
| 17 | 1 | 6  | 4.9 | 4.1 | 3.9  | 5.6E-11 | 4.0E-11 | 6.5E-11 |
| 17 | 1 | 7  | 5.3 | 4.8 | 2.4  | 4.1E-11 | 2.9E-11 | 4.6E-11 |
| 17 | 1 | 8  | 4.8 | 3.7 | 5.7  | 8.0E-11 | 5.7E-11 | 9.2E-11 |
| 17 | 1 | 10 | 6.4 | 5.3 | 8.8  | 1.9E-10 | 1.4E-10 | 2.1E-10 |
| 17 | 1 | 12 | 5.3 | 4.6 | 4.3  | 7.0E-11 | 5.1E-11 | 8.1E-11 |
| 17 | 1 | 14 | 5.7 | 4.0 | 8.4  | 1.4E-10 | 1.0E-10 | 1.6E-10 |
| 17 | 1 | 16 | 4.7 | 4.5 | 0.9  | 1.4E-11 | 9.7E-12 | 1.6E-11 |
| 17 | 1 | 17 | 4.9 | 4.0 | 5.0  | 7.2E-11 | 5.2E-11 | 8.4E-11 |
| 17 | 1 | 19 | 6.5 | 4.7 | 9.4  | 1.8E-10 | 1.4E-10 | 2.1E-10 |
| 17 | 1 | 22 | 6.0 | 4.3 | 7.8  | 1.4E-10 | 1.0E-10 | 1.6E-10 |
| 17 | 1 | 23 | 4.0 | 3.4 | 3.6  | 3.9E-11 | 2.7E-11 | 4.6E-11 |
| 17 | 2 | 1  | 6.6 | 5.4 | 4.5  | 9.6E-11 | 7.2E-11 | 1.1E-10 |
| 17 | 2 | 4  | 6.3 | 5.0 | 3.6  | 7.1E-11 | 5.3E-11 | 8.1E-11 |
| 17 | 2 | 8  | 5.5 | 4.6 | 4.1  | 7.0E-11 | 5.1E-11 | 8.0E-11 |
| 17 | 2 | 9  | 6.2 | 5.0 | 5.0  | 9.8E-11 | 7.2E-11 | 1.1E-10 |
| 17 | 2 | 10 | 5.7 | 3.9 | 5.0  | 8.0E-11 | 5.7E-11 | 9.1E-11 |

|    |   |    |     |     |     |         |         |         |
|----|---|----|-----|-----|-----|---------|---------|---------|
| 17 | 2 | 11 | 5.3 | 4.3 | 3.9 | 6.2E-11 | 4.5E-11 | 7.1E-11 |
| 17 | 2 | 13 | 5.8 | 4.6 | 4.0 | 7.1E-11 | 5.2E-11 | 8.1E-11 |
| 17 | 2 | 14 | 5.5 | 4.5 | 8.5 | 1.3E-10 | 9.6E-11 | 1.5E-10 |
| 17 | 2 | 15 | 5.2 | 3.7 | 4.1 | 5.9E-11 | 4.2E-11 | 6.8E-11 |

***E.huxleyi***

| Day | Experiment no. | particle no. | initial $r_{\text{eff}}(\mu\text{m})$ | end $r_{\text{eff}}(\mu\text{m})$ | Dissolution time(s) | CaCO <sub>3</sub> (Rf = 4) / g | CaCO <sub>3</sub> (Rf = 2) / g | CaCO <sub>3</sub> (Rf = 6) / g |         |
|-----|----------------|--------------|---------------------------------------|-----------------------------------|---------------------|--------------------------------|--------------------------------|--------------------------------|---------|
| 1   | 1              | 1            | 2                                     | 3.8                               | 3.3                 | 1.6                            | 1.7E-11                        | 1.1E-11                        | 2.0E-11 |
| 1   | 1              | 1            | 3                                     | 3.9                               | 3.2                 | 2.2                            | 2.3E-11                        | 1.5E-11                        | 2.7E-11 |
| 1   | 1              | 1            | 4                                     | 3.7                               | 3.0                 | 1.6                            | 1.5E-11                        | 1.0E-11                        | 1.8E-11 |
| 1   | 1              | 1            | 5                                     | 4.3                               | 3.6                 | 1.7                            | 2.1E-11                        | 1.5E-11                        | 2.4E-11 |
| 1   | 1              | 1            | 6                                     | 3.7                               | 3.1                 | 1.7                            | 1.7E-11                        | 1.1E-11                        | 2.0E-11 |
| 1   | 1              | 1            | 7                                     | 3.7                               | 3.1                 | 2.0                            | 2.0E-11                        | 1.4E-11                        | 2.4E-11 |
| 1   | 1              | 1            | 8                                     | 3.7                               | 3.2                 | 2.0                            | 2.0E-11                        | 1.3E-11                        | 2.3E-11 |
| 1   | 1              | 1            | 9                                     | 3.4                               | 2.8                 | 1.6                            | 1.3E-11                        | 9.0E-12                        | 1.6E-11 |
| 1   | 1              | 1            | 11                                    | 3.8                               | 3.3                 | 1.7                            | 1.7E-11                        | 1.2E-11                        | 2.1E-11 |
| 1   | 1              | 1            | 12                                    | 3.6                               | 2.9                 | 2.2                            | 2.0E-11                        | 1.3E-11                        | 2.4E-11 |
| 1   | 1              | 1            | 13                                    | 4.2                               | 3.9                 | 1.6                            | 2.0E-11                        | 1.4E-11                        | 2.4E-11 |
| 1   | 1              | 1            | 14                                    | 3.9                               | 3.3                 | 2.8                            | 2.9E-11                        | 2.0E-11                        | 3.5E-11 |
| 1   | 1              | 1            | 15                                    | 4.3                               | 4.1                 | 0.6                            | 7.9E-12                        | 5.6E-12                        | 9.2E-12 |
| 1   | 1              | 1            | 16                                    | 3.9                               | 3.2                 | 2.4                            | 2.5E-11                        | 1.7E-11                        | 2.9E-11 |
| 1   | 1              | 1            | 17                                    | 3.6                               | 3.0                 | 2.4                            | 2.3E-11                        | 1.5E-11                        | 2.7E-11 |
| 1   | 1              | 1            | 18                                    | 4.1                               | 3.6                 | 1.4                            | 1.6E-11                        | 1.1E-11                        | 1.9E-11 |
| 1   | 1              | 1            | 19                                    | 4.1                               | 3.3                 | 3.9                            | 4.3E-11                        | 3.0E-11                        | 5.1E-11 |
| 1   | 1              | 1            | 21                                    | 3.9                               | 3.0                 | 2.9                            | 2.8E-11                        | 1.9E-11                        | 3.4E-11 |
| 1   | 1              | 1            | 22                                    | 3.7                               | 3.5                 | 1.2                            | 1.3E-11                        | 8.9E-12                        | 1.5E-11 |
| 1   | 1              | 1            | 24                                    | 3.8                               | 3.2                 | 2.0                            | 2.0E-11                        | 1.4E-11                        | 2.4E-11 |
| 1   | 1              | 1            | 26                                    | 3.8                               | 3.4                 | 1.5                            | 1.6E-11                        | 1.1E-11                        | 1.9E-11 |
| 1   | 1              | 1            | 27                                    | 3.5                               | 3.0                 | 1.5                            | 1.4E-11                        | 9.2E-12                        | 1.6E-11 |
| 1   | 1              | 1            | 29                                    | 3.5                               | 3.1                 | 1.2                            | 1.1E-11                        | 7.6E-12                        | 1.3E-11 |
| 1   | 1              | 1            | 30                                    | 3.6                               | 3.0                 | 1.6                            | 1.5E-11                        | 1.0E-11                        | 1.8E-11 |
| 1   | 1              | 1            | 31                                    | 3.6                               | 3.4                 | 0.6                            | 6.0E-12                        | 4.1E-12                        | 7.1E-12 |
| 1   | 1              | 1            | 33                                    | 4.1                               | 3.3                 | 3.0                            | 3.3E-11                        | 2.3E-11                        | 3.9E-11 |
| 1   | 1              | 1            | 34                                    | 3.9                               | 3.3                 | 2.1                            | 2.2E-11                        | 1.5E-11                        | 2.6E-11 |
| 1   | 1              | 1            | 37                                    | 4.5                               | 4.2                 | 1.0                            | 1.4E-11                        | 9.8E-12                        | 1.6E-11 |
| 1   | 1              | 1            | 38                                    | 3.7                               | 3.2                 | 1.3                            | 1.3E-11                        | 8.9E-12                        | 1.5E-11 |
| 1   | 3              | 3            | 3                                     | 3.5                               | 2.9                 | 1.9                            | 1.6E-11                        | 1.1E-11                        | 2.0E-11 |

|   |   |    |     |     |     |         |         |         |
|---|---|----|-----|-----|-----|---------|---------|---------|
| 1 | 3 | 4  | 3.8 | 3.2 | 1.0 | 1.0E-11 | 7.0E-12 | 1.2E-11 |
| 1 | 3 | 5  | 4.5 | 3.7 | 2.3 | 2.9E-11 | 2.0E-11 | 3.4E-11 |
| 1 | 3 | 6  | 3.6 | 3.1 | 1.1 | 1.1E-11 | 7.2E-12 | 1.3E-11 |
| 1 | 3 | 7  | 3.3 | 2.9 | 0.9 | 7.4E-12 | 4.9E-12 | 8.9E-12 |
| 1 | 3 | 8  | 3.9 | 3.1 | 2.0 | 2.1E-11 | 1.5E-11 | 2.5E-11 |
| 1 | 3 | 9  | 3.6 | 2.9 | 1.9 | 1.7E-11 | 1.2E-11 | 2.1E-11 |
| 1 | 3 | 10 | 3.4 | 2.7 | 1.6 | 1.4E-11 | 9.0E-12 | 1.6E-11 |
| 1 | 3 | 11 | 3.6 | 2.9 | 2.1 | 1.9E-11 | 1.3E-11 | 2.3E-11 |
| 1 | 3 | 12 | 3.9 | 3.2 | 2.0 | 2.1E-11 | 1.4E-11 | 2.5E-11 |
| 1 | 3 | 13 | 3.7 | 2.8 | 3.0 | 2.7E-11 | 1.8E-11 | 3.2E-11 |
| 1 | 3 | 14 | 3.8 | 3.2 | 2.5 | 2.5E-11 | 1.7E-11 | 3.0E-11 |
| 1 | 3 | 15 | 4.1 | 3.2 | 2.1 | 2.3E-11 | 1.6E-11 | 2.7E-11 |
| 1 | 3 | 16 | 3.6 | 2.6 | 2.4 | 2.0E-11 | 1.3E-11 | 2.4E-11 |
| 1 | 3 | 17 | 3.3 | 2.5 | 3.0 | 2.2E-11 | 1.5E-11 | 2.7E-11 |
| 1 | 3 | 18 | 3.9 | 3.1 | 2.4 | 2.5E-11 | 1.7E-11 | 2.9E-11 |
| 1 | 3 | 21 | 3.8 | 3.1 | 1.9 | 1.9E-11 | 1.3E-11 | 2.3E-11 |
| 1 | 3 | 22 | 4.1 | 3.2 | 2.8 | 3.0E-11 | 2.1E-11 | 3.6E-11 |
| 1 | 3 | 23 | 3.4 | 2.7 | 1.8 | 1.5E-11 | 9.8E-12 | 1.8E-11 |
| 1 | 3 | 24 | 3.9 | 2.9 | 2.8 | 2.9E-11 | 2.0E-11 | 3.4E-11 |
| 1 | 3 | 25 | 3.9 | 3.1 | 1.6 | 1.6E-11 | 1.1E-11 | 1.9E-11 |
| 1 | 3 | 26 | 3.7 | 3.4 | 0.5 | 5.2E-12 | 3.5E-12 | 6.1E-12 |
| 1 | 3 | 27 | 2.8 | 2.4 | 1.0 | 6.6E-12 | 4.3E-12 | 8.1E-12 |
| 1 | 3 | 28 | 3.6 | 2.8 | 2.3 | 2.0E-11 | 1.3E-11 | 2.4E-11 |
| 3 | 1 | 1  | 3.7 | 2.9 | 2.0 | 1.9E-11 | 1.3E-11 | 2.3E-11 |
| 3 | 1 | 2  | 4.0 | 3.0 | 2.5 | 2.6E-11 | 1.8E-11 | 3.0E-11 |
| 3 | 1 | 3  | 3.6 | 2.8 | 2.0 | 1.8E-11 | 1.2E-11 | 2.1E-11 |
| 3 | 1 | 4  | 3.2 | 2.6 | 1.3 | 1.0E-11 | 6.6E-12 | 1.2E-11 |
| 3 | 1 | 5  | 3.1 | 2.5 | 1.8 | 1.3E-11 | 8.6E-12 | 1.6E-11 |
| 3 | 1 | 6  | 3.6 | 2.7 | 2.2 | 2.0E-11 | 1.3E-11 | 2.4E-11 |
| 3 | 1 | 7  | 3.6 | 2.7 | 2.5 | 2.2E-11 | 1.4E-11 | 2.6E-11 |
| 3 | 1 | 8  | 3.9 | 3.0 | 3.2 | 3.2E-11 | 2.2E-11 | 3.8E-11 |
| 3 | 1 | 9  | 3.7 | 2.8 | 2.0 | 1.8E-11 | 1.2E-11 | 2.1E-11 |
| 3 | 1 | 10 | 3.6 | 2.8 | 1.9 | 1.8E-11 | 1.2E-11 | 2.1E-11 |
| 3 | 1 | 11 | 3.2 | 2.7 | 1.7 | 1.4E-11 | 9.0E-12 | 1.6E-11 |
| 3 | 1 | 12 | 3.7 | 2.8 | 2.2 | 2.0E-11 | 1.3E-11 | 2.3E-11 |
| 3 | 1 | 13 | 3.3 | 2.5 | 2.6 | 2.0E-11 | 1.3E-11 | 2.4E-11 |
| 3 | 1 | 14 | 3.3 | 2.4 | 2.2 | 1.6E-11 | 1.1E-11 | 2.0E-11 |



|   |   |    |     |     |     |         |         |         |
|---|---|----|-----|-----|-----|---------|---------|---------|
| 3 | 1 | 15 | 2.9 | 2.2 | 1.5 | 9.8E-12 | 6.4E-12 | 1.2E-11 |
| 3 | 1 | 16 | 3.2 | 2.4 | 2.2 | 1.6E-11 | 1.0E-11 | 1.9E-11 |
| 3 | 1 | 19 | 3.6 | 2.7 | 3.7 | 3.3E-11 | 2.2E-11 | 3.9E-11 |
| 3 | 1 | 20 | 3.4 | 2.8 | 2.2 | 1.9E-11 | 1.2E-11 | 2.2E-11 |
| 3 | 1 | 21 | 3.1 | 2.5 | 1.5 | 1.1E-11 | 7.0E-12 | 1.3E-11 |
| 3 | 1 | 22 | 4.1 | 3.3 | 3.2 | 3.5E-11 | 2.4E-11 | 4.1E-11 |
| 3 | 1 | 23 | 3.6 | 2.7 | 3.2 | 2.8E-11 | 1.9E-11 | 3.4E-11 |
| 3 | 1 | 24 | 3.5 | 2.8 | 2.7 | 2.3E-11 | 1.6E-11 | 2.8E-11 |
| 3 | 1 | 29 | 3.2 | 2.5 | 1.4 | 1.1E-11 | 7.1E-12 | 1.3E-11 |
| 3 | 1 | 31 | 3.8 | 3.0 | 2.5 | 2.4E-11 | 1.6E-11 | 2.9E-11 |
| 3 | 1 | 32 | 3.6 | 2.8 | 2.3 | 2.0E-11 | 1.3E-11 | 2.4E-11 |
| 3 | 1 | 34 | 4.0 | 3.2 | 2.8 | 3.0E-11 | 2.0E-11 | 3.5E-11 |
| 3 | 1 | 35 | 3.2 | 2.5 | 1.9 | 1.5E-11 | 9.6E-12 | 1.8E-11 |
| 3 | 1 | 36 | 3.5 | 2.7 | 2.9 | 2.4E-11 | 1.6E-11 | 2.9E-11 |
| 3 | 1 | 37 | 3.4 | 2.8 | 1.9 | 1.6E-11 | 1.1E-11 | 1.9E-11 |
| 3 | 1 | 38 | 3.6 | 2.7 | 3.1 | 2.7E-11 | 1.8E-11 | 3.2E-11 |
| 3 | 1 | 39 | 3.5 | 2.6 | 2.7 | 2.2E-11 | 1.5E-11 | 2.6E-11 |
| 3 | 1 | 40 | 3.7 | 2.9 | 2.3 | 2.1E-11 | 1.4E-11 | 2.5E-11 |
| 3 | 1 | 41 | 3.8 | 2.9 | 3.4 | 3.3E-11 | 2.2E-11 | 3.9E-11 |
| 3 | 1 | 49 | 3.5 | 2.8 | 2.2 | 1.9E-11 | 1.3E-11 | 2.3E-11 |
| 3 | 1 | 52 | 3.7 | 2.9 | 3.1 | 2.9E-11 | 1.9E-11 | 3.4E-11 |
| 3 | 1 | 53 | 3.4 | 2.7 | 2.4 | 2.0E-11 | 1.3E-11 | 2.4E-11 |
| 3 | 1 | 54 | 3.9 | 3.2 | 2.1 | 2.2E-11 | 1.5E-11 | 2.6E-11 |
| 3 | 1 | 55 | 3.3 | 2.5 | 1.5 | 1.1E-11 | 7.2E-12 | 1.3E-11 |
| 3 | 1 | 56 | 3.7 | 3.0 | 2.5 | 2.4E-11 | 1.7E-11 | 2.9E-11 |
| 3 | 1 | 58 | 3.1 | 2.7 | 0.9 | 7.0E-12 | 4.7E-12 | 8.5E-12 |
| 3 | 1 | 59 | 3.6 | 2.8 | 3.0 | 2.6E-11 | 1.8E-11 | 3.1E-11 |
| 3 | 2 | 6  | 3.9 | 3.0 | 3.7 | 3.6E-11 | 2.5E-11 | 4.3E-11 |
| 3 | 2 | 8  | 3.8 | 3.0 | 5.5 | 5.5E-11 | 3.8E-11 | 6.6E-11 |
| 3 | 2 | 10 | 3.6 | 2.7 | 4.1 | 3.7E-11 | 2.5E-11 | 4.4E-11 |
| 3 | 2 | 11 | 3.9 | 3.1 | 3.8 | 3.8E-11 | 2.6E-11 | 4.5E-11 |
| 3 | 2 | 12 | 3.2 | 2.4 | 2.8 | 2.1E-11 | 1.4E-11 | 2.6E-11 |
| 3 | 2 | 15 | 3.8 | 3.2 | 2.2 | 2.3E-11 | 1.6E-11 | 2.7E-11 |
| 3 | 2 | 16 | 3.6 | 2.7 | 3.7 | 3.3E-11 | 2.3E-11 | 4.0E-11 |
| 3 | 2 | 17 | 3.6 | 2.6 | 4.9 | 4.2E-11 | 2.8E-11 | 5.0E-11 |
| 3 | 2 | 18 | 3.7 | 2.9 | 3.9 | 3.6E-11 | 2.5E-11 | 4.3E-11 |
| 3 | 2 | 19 | 3.8 | 3.1 | 3.3 | 3.3E-11 | 2.3E-11 | 3.9E-11 |

|   |   |    |     |     |     |         |         |         |
|---|---|----|-----|-----|-----|---------|---------|---------|
| 3 | 2 | 20 | 3.8 | 2.7 | 2.9 | 2.6E-11 | 1.7E-11 | 3.1E-11 |
| 3 | 2 | 21 | 3.6 | 2.9 | 3.5 | 3.2E-11 | 2.2E-11 | 3.9E-11 |
| 3 | 2 | 23 | 4.3 | 3.9 | 2.9 | 3.7E-11 | 2.6E-11 | 4.3E-11 |
| 3 | 2 | 25 | 3.9 | 3.0 | 4.1 | 4.2E-11 | 2.9E-11 | 4.9E-11 |
| 3 | 2 | 26 | 4.3 | 3.4 | 5.6 | 6.8E-11 | 4.7E-11 | 8.0E-11 |
| 3 | 2 | 27 | 3.8 | 3.0 | 3.9 | 3.8E-11 | 2.6E-11 | 4.6E-11 |
| 3 | 2 | 28 | 3.6 | 2.8 | 3.6 | 3.3E-11 | 2.2E-11 | 3.9E-11 |
| 3 | 2 | 29 | 3.6 | 2.8 | 4.0 | 3.7E-11 | 2.5E-11 | 4.4E-11 |
| 3 | 2 | 30 | 3.6 | 2.8 | 3.3 | 2.9E-11 | 2.0E-11 | 3.5E-11 |
| 3 | 2 | 31 | 3.6 | 2.8 | 3.8 | 3.4E-11 | 2.3E-11 | 4.0E-11 |
| 3 | 2 | 32 | 3.1 | 2.4 | 2.5 | 1.8E-11 | 1.2E-11 | 2.1E-11 |
| 3 | 2 | 33 | 4.1 | 3.1 | 5.1 | 5.5E-11 | 3.8E-11 | 6.5E-11 |
| 3 | 2 | 35 | 3.3 | 2.6 | 3.5 | 2.9E-11 | 1.9E-11 | 3.4E-11 |
| 3 | 2 | 37 | 3.6 | 2.8 | 3.0 | 2.7E-11 | 1.8E-11 | 3.2E-11 |
| 3 | 2 | 38 | 3.5 | 2.7 | 2.5 | 2.2E-11 | 1.5E-11 | 2.6E-11 |
| 3 | 2 | 39 | 3.5 | 2.9 | 1.9 | 1.7E-11 | 1.2E-11 | 2.1E-11 |
| 3 | 2 | 40 | 3.5 | 2.9 | 2.4 | 2.2E-11 | 1.5E-11 | 2.6E-11 |
| 3 | 2 | 41 | 3.3 | 2.6 | 2.2 | 1.7E-11 | 1.1E-11 | 2.1E-11 |
| 3 | 2 | 42 | 3.3 | 2.6 | 3.0 | 2.5E-11 | 1.7E-11 | 3.0E-11 |
| 3 | 2 | 43 | 3.7 | 2.8 | 3.5 | 3.3E-11 | 2.2E-11 | 3.9E-11 |
| 5 | 1 | 3  | 3.8 | 2.7 | 3.1 | 2.9E-11 | 1.9E-11 | 3.4E-11 |
| 5 | 1 | 5  | 4.2 | 2.9 | 4.8 | 5.0E-11 | 3.4E-11 | 5.9E-11 |
| 5 | 1 | 6  | 3.5 | 2.5 | 3.0 | 2.4E-11 | 1.6E-11 | 2.9E-11 |
| 5 | 1 | 8  | 3.6 | 2.7 | 3.6 | 3.2E-11 | 2.1E-11 | 3.8E-11 |
| 5 | 1 | 9  | 3.8 | 2.6 | 3.2 | 2.9E-11 | 1.9E-11 | 3.4E-11 |
| 5 | 1 | 10 | 3.6 | 2.7 | 2.9 | 2.5E-11 | 1.7E-11 | 3.0E-11 |
| 5 | 1 | 14 | 3.4 | 2.1 | 3.4 | 2.5E-11 | 1.6E-11 | 3.0E-11 |
| 5 | 1 | 15 | 3.2 | 3.1 | 0.3 | 2.6E-12 | 1.7E-12 | 3.1E-12 |
| 5 | 1 | 16 | 3.3 | 2.2 | 3.2 | 2.3E-11 | 1.5E-11 | 2.8E-11 |
| 5 | 1 | 17 | 3.5 | 2.3 | 4.4 | 3.2E-11 | 2.1E-11 | 3.9E-11 |
| 5 | 1 | 18 | 3.6 | 2.6 | 4.2 | 3.5E-11 | 2.4E-11 | 4.2E-11 |
| 5 | 1 | 19 | 3.4 | 2.4 | 3.0 | 2.4E-11 | 1.6E-11 | 2.8E-11 |
| 5 | 1 | 22 | 3.5 | 2.5 | 3.4 | 2.8E-11 | 1.9E-11 | 3.4E-11 |
| 5 | 1 | 24 | 3.9 | 2.6 | 5.5 | 5.0E-11 | 3.4E-11 | 5.9E-11 |
| 5 | 1 | 25 | 3.2 | 2.2 | 2.3 | 1.6E-11 | 1.1E-11 | 2.0E-11 |
| 5 | 1 | 26 | 3.4 | 2.4 | 3.0 | 2.3E-11 | 1.5E-11 | 2.8E-11 |
| 5 | 1 | 27 | 3.7 | 2.6 | 2.6 | 2.2E-11 | 1.5E-11 | 2.7E-11 |

|   |   |    |     |     |     |         |         |         |
|---|---|----|-----|-----|-----|---------|---------|---------|
| 5 | 1 | 28 | 4.1 | 2.7 | 4.4 | 4.3E-11 | 2.9E-11 | 5.0E-11 |
| 5 | 1 | 30 | 3.9 | 2.9 | 2.2 | 2.1E-11 | 1.4E-11 | 2.5E-11 |
| 5 | 1 | 32 | 3.2 | 2.2 | 3.8 | 2.7E-11 | 1.8E-11 | 3.2E-11 |
| 5 | 1 | 33 | 4.0 | 3.1 | 3.3 | 3.5E-11 | 2.4E-11 | 4.2E-11 |
| 5 | 1 | 34 | 3.6 | 2.7 | 3.2 | 2.8E-11 | 1.9E-11 | 3.3E-11 |
| 5 | 1 | 35 | 3.1 | 2.2 | 1.8 | 1.2E-11 | 7.8E-12 | 1.5E-11 |
| 5 | 1 | 36 | 3.5 | 2.5 | 3.7 | 3.0E-11 | 2.0E-11 | 3.6E-11 |
| 5 | 1 | 37 | 3.5 | 2.3 | 2.3 | 1.8E-11 | 1.2E-11 | 2.2E-11 |
| 5 | 1 | 38 | 3.5 | 2.4 | 5.1 | 4.1E-11 | 2.7E-11 | 4.9E-11 |
| 5 | 1 | 43 | 3.5 | 2.4 | 5.4 | 4.2E-11 | 2.8E-11 | 5.0E-11 |
| 5 | 1 | 46 | 3.7 | 2.6 | 2.7 | 2.3E-11 | 1.5E-11 | 2.7E-11 |
| 5 | 1 | 49 | 3.7 | 2.5 | 5.8 | 5.0E-11 | 3.3E-11 | 5.9E-11 |
| 5 | 1 | 53 | 3.1 | 2.4 | 2.0 | 1.4E-11 | 8.8E-12 | 1.6E-11 |
| 5 | 3 | 2  | 3.7 | 2.9 | 2.6 | 2.5E-11 | 1.7E-11 | 3.0E-11 |
| 5 | 3 | 6  | 3.5 | 2.7 | 3.3 | 3.0E-11 | 2.0E-11 | 3.5E-11 |
| 5 | 3 | 7  | 3.9 | 3.4 | 2.0 | 2.2E-11 | 1.5E-11 | 2.6E-11 |
| 5 | 3 | 8  | 4.0 | 3.5 | 2.7 | 3.2E-11 | 2.2E-11 | 3.7E-11 |
| 5 | 3 | 9  | 3.6 | 2.8 | 2.7 | 2.5E-11 | 1.7E-11 | 3.0E-11 |
| 5 | 3 | 10 | 3.6 | 2.7 | 3.4 | 3.0E-11 | 2.0E-11 | 3.6E-11 |
| 5 | 3 | 11 | 3.6 | 2.9 | 2.7 | 2.5E-11 | 1.7E-11 | 3.0E-11 |
| 5 | 3 | 12 | 3.8 | 3.4 | 1.8 | 2.0E-11 | 1.4E-11 | 2.3E-11 |
| 5 | 3 | 14 | 3.8 | 3.1 | 3.2 | 3.3E-11 | 2.3E-11 | 3.9E-11 |
| 5 | 3 | 18 | 3.7 | 3.0 | 5.3 | 5.2E-11 | 3.5E-11 | 6.1E-11 |
| 5 | 3 | 19 | 3.6 | 2.7 | 2.4 | 2.2E-11 | 1.5E-11 | 2.6E-11 |
| 5 | 3 | 21 | 3.9 | 3.4 | 4.8 | 5.4E-11 | 3.8E-11 | 6.4E-11 |
| 5 | 3 | 23 | 3.8 | 3.2 | 4.1 | 4.4E-11 | 3.0E-11 | 5.2E-11 |
| 5 | 3 | 26 | 3.5 | 3.1 | 1.5 | 1.4E-11 | 9.8E-12 | 1.7E-11 |
| 5 | 3 | 27 | 4.0 | 3.3 | 3.1 | 3.4E-11 | 2.3E-11 | 4.0E-11 |
| 5 | 3 | 33 | 3.8 | 3.4 | 1.8 | 2.0E-11 | 1.3E-11 | 2.3E-11 |
| 5 | 3 | 34 | 4.6 | 4.1 | 3.1 | 4.5E-11 | 3.2E-11 | 5.2E-11 |
| 5 | 3 | 35 | 3.5 | 2.8 | 3.4 | 3.0E-11 | 2.1E-11 | 3.6E-11 |
| 5 | 3 | 38 | 3.8 | 3.1 | 2.4 | 2.5E-11 | 1.7E-11 | 2.9E-11 |
| 5 | 3 | 39 | 3.7 | 2.8 | 2.5 | 2.3E-11 | 1.6E-11 | 2.8E-11 |
| 5 | 3 | 41 | 3.6 | 3.0 | 2.0 | 1.9E-11 | 1.3E-11 | 2.3E-11 |
| 5 | 3 | 43 | 3.7 | 3.1 | 1.7 | 1.7E-11 | 1.2E-11 | 2.0E-11 |
| 5 | 3 | 44 | 4.1 | 3.8 | 1.4 | 1.7E-11 | 1.2E-11 | 2.0E-11 |
| 5 | 3 | 45 | 3.7 | 3.4 | 1.5 | 1.6E-11 | 1.1E-11 | 1.9E-11 |

|   |   |    |     |     |     |         |         |         |
|---|---|----|-----|-----|-----|---------|---------|---------|
| 5 | 3 | 46 | 3.5 | 3.0 | 1.4 | 1.3E-11 | 9.0E-12 | 1.6E-11 |
| 5 | 3 | 47 | 3.9 | 3.2 | 3.1 | 3.4E-11 | 2.4E-11 | 4.1E-11 |
| 7 | 1 | 9  | 3.2 | 2.2 | 5.6 | 4.2E-11 | 2.7E-11 | 5.0E-11 |
| 7 | 1 | 11 | 3.4 | 2.5 | 5.9 | 4.8E-11 | 3.2E-11 | 5.7E-11 |
| 7 | 1 | 13 | 3.3 | 2.4 | 6.1 | 4.9E-11 | 3.2E-11 | 5.8E-11 |
| 7 | 1 | 15 | 3.5 | 2.7 | 5.9 | 5.2E-11 | 3.5E-11 | 6.2E-11 |
| 7 | 1 | 16 | 3.2 | 2.2 | 4.9 | 3.5E-11 | 2.3E-11 | 4.3E-11 |
| 7 | 1 | 18 | 3.5 | 2.9 | 3.8 | 3.5E-11 | 2.4E-11 | 4.2E-11 |
| 7 | 1 | 21 | 3.6 | 3.0 | 4.7 | 4.6E-11 | 3.1E-11 | 5.4E-11 |
| 7 | 1 | 22 | 4.0 | 3.1 | 5.8 | 6.3E-11 | 4.3E-11 | 7.4E-11 |
| 7 | 1 | 23 | 3.6 | 2.8 | 4.5 | 4.0E-11 | 2.7E-11 | 4.8E-11 |
| 7 | 1 | 24 | 3.2 | 2.5 | 2.4 | 1.8E-11 | 1.2E-11 | 2.2E-11 |
| 7 | 1 | 25 | 3.5 | 2.7 | 2.9 | 2.5E-11 | 1.7E-11 | 3.0E-11 |
| 7 | 1 | 26 | 3.3 | 2.7 | 2.9 | 2.4E-11 | 1.6E-11 | 2.9E-11 |
| 7 | 1 | 27 | 3.3 | 2.5 | 3.2 | 2.5E-11 | 1.7E-11 | 3.1E-11 |
| 7 | 1 | 29 | 3.6 | 2.7 | 5.1 | 4.6E-11 | 3.1E-11 | 5.5E-11 |
| 7 | 1 | 31 | 3.3 | 2.4 | 4.3 | 3.5E-11 | 2.3E-11 | 4.2E-11 |
| 7 | 1 | 32 | 3.4 | 2.7 | 3.1 | 2.6E-11 | 1.8E-11 | 3.2E-11 |
| 7 | 1 | 33 | 3.6 | 2.9 | 3.5 | 3.3E-11 | 2.2E-11 | 3.9E-11 |
| 7 | 1 | 34 | 3.4 | 2.5 | 4.5 | 3.8E-11 | 2.6E-11 | 4.6E-11 |
| 7 | 1 | 36 | 3.5 | 2.7 | 2.7 | 2.3E-11 | 1.5E-11 | 2.7E-11 |
| 7 | 1 | 38 | 3.7 | 2.8 | 5.7 | 5.5E-11 | 3.7E-11 | 6.5E-11 |
| 7 | 1 | 44 | 3.5 | 2.8 | 3.6 | 3.2E-11 | 2.1E-11 | 3.8E-11 |
| 7 | 1 | 45 | 3.6 | 3.1 | 2.4 | 2.3E-11 | 1.6E-11 | 2.7E-11 |
| 7 | 1 | 46 | 3.6 | 3.0 | 3.1 | 3.0E-11 | 2.1E-11 | 3.6E-11 |
| 7 | 1 | 51 | 3.5 | 2.5 | 4.0 | 3.4E-11 | 2.3E-11 | 4.1E-11 |
| 7 | 2 | 1  | 3.1 | 2.2 | 2.3 | 1.5E-11 | 1.0E-11 | 1.9E-11 |
| 7 | 2 | 2  | 3.3 | 2.2 | 3.3 | 2.3E-11 | 1.5E-11 | 2.8E-11 |
| 7 | 2 | 10 | 3.5 | 2.3 | 5.3 | 4.4E-11 | 2.9E-11 | 5.2E-11 |
| 7 | 2 | 13 | 3.4 | 2.4 | 5.3 | 4.2E-11 | 2.8E-11 | 5.0E-11 |
| 7 | 2 | 16 | 2.9 | 2.2 | 1.5 | 9.6E-12 | 6.2E-12 | 1.2E-11 |
| 7 | 2 | 19 | 3.8 | 2.9 | 2.6 | 2.5E-11 | 1.7E-11 | 3.0E-11 |
| 7 | 2 | 22 | 3.4 | 2.4 | 4.4 | 3.3E-11 | 2.2E-11 | 4.0E-11 |
| 7 | 2 | 23 | 3.6 | 2.7 | 3.9 | 3.4E-11 | 2.3E-11 | 4.0E-11 |
| 7 | 2 | 24 | 3.5 | 2.7 | 3.2 | 2.7E-11 | 1.8E-11 | 3.2E-11 |
| 7 | 2 | 28 | 3.5 | 2.5 | 4.0 | 3.3E-11 | 2.2E-11 | 3.9E-11 |
| 7 | 2 | 29 | 4.3 | 3.3 | 5.7 | 6.5E-11 | 4.5E-11 | 7.6E-11 |

|   |   |    |     |     |     |         |         |         |
|---|---|----|-----|-----|-----|---------|---------|---------|
| 7 | 2 | 30 | 3.1 | 2.6 | 1.7 | 1.3E-11 | 8.5E-12 | 1.6E-11 |
| 7 | 2 | 33 | 3.5 | 2.5 | 3.7 | 3.0E-11 | 2.0E-11 | 3.7E-11 |
| 7 | 2 | 35 | 3.2 | 2.3 | 4.0 | 2.7E-11 | 1.8E-11 | 3.3E-11 |
| 7 | 2 | 36 | 3.3 | 2.4 | 2.8 | 2.1E-11 | 1.4E-11 | 2.5E-11 |
| 7 | 2 | 37 | 3.2 | 2.5 | 2.0 | 1.6E-11 | 1.0E-11 | 1.9E-11 |
| 7 | 2 | 47 | 3.8 | 2.7 | 4.1 | 3.8E-11 | 2.6E-11 | 4.5E-11 |
| 7 | 2 | 48 | 3.6 | 2.7 | 3.3 | 2.9E-11 | 2.0E-11 | 3.5E-11 |
| 7 | 2 | 50 | 2.9 | 2.1 | 2.7 | 1.7E-11 | 1.1E-11 | 2.0E-11 |
| 7 | 2 | 51 | 4.0 | 2.9 | 3.5 | 3.7E-11 | 2.5E-11 | 4.3E-11 |
| 7 | 2 | 52 | 3.4 | 2.4 | 3.4 | 2.6E-11 | 1.7E-11 | 3.1E-11 |
| 7 | 2 | 53 | 3.6 | 2.8 | 2.4 | 2.1E-11 | 1.4E-11 | 2.5E-11 |
| 7 | 2 | 54 | 4.0 | 3.1 | 4.2 | 4.2E-11 | 2.9E-11 | 5.0E-11 |
| 7 | 2 | 55 | 3.5 | 2.6 | 3.6 | 2.9E-11 | 2.0E-11 | 3.5E-11 |
| 7 | 2 | 56 | 3.6 | 2.9 | 2.1 | 1.9E-11 | 1.3E-11 | 2.3E-11 |
| 7 | 2 | 57 | 3.5 | 2.6 | 2.7 | 2.3E-11 | 1.5E-11 | 2.8E-11 |
| 7 | 2 | 59 | 3.3 | 2.6 | 2.2 | 1.7E-11 | 1.1E-11 | 2.1E-11 |
| 7 | 2 | 60 | 3.8 | 3.1 | 2.7 | 2.8E-11 | 1.9E-11 | 3.3E-11 |
| 7 | 2 | 61 | 3.8 | 2.9 | 3.4 | 3.3E-11 | 2.2E-11 | 3.9E-11 |
| 7 | 2 | 70 | 3.6 | 2.8 | 2.9 | 2.6E-11 | 1.7E-11 | 3.1E-11 |
| 7 | 2 | 72 | 3.6 | 3.0 | 1.7 | 1.6E-11 | 1.1E-11 | 1.9E-11 |
| 7 | 2 | 73 | 3.9 | 3.0 | 3.3 | 3.4E-11 | 2.3E-11 | 4.0E-11 |
| 7 | 2 | 76 | 3.2 | 2.3 | 2.6 | 1.9E-11 | 1.2E-11 | 2.3E-11 |
| 7 | 2 | 77 | 4.1 | 3.2 | 3.5 | 3.9E-11 | 2.7E-11 | 4.6E-11 |
| 7 | 2 | 78 | 3.6 | 2.6 | 3.0 | 2.4E-11 | 1.6E-11 | 2.9E-11 |
| 7 | 2 | 79 | 3.7 | 3.3 | 1.6 | 1.6E-11 | 1.1E-11 | 1.9E-11 |
| 9 | 1 | 3  | 3.2 | 2.5 | 1.5 | 1.1E-11 | 7.4E-12 | 1.4E-11 |
| 9 | 1 | 4  | 3.1 | 2.8 | 0.8 | 6.2E-12 | 4.1E-12 | 7.5E-12 |
| 9 | 1 | 5  | 3.5 | 2.8 | 1.5 | 1.3E-11 | 8.8E-12 | 1.6E-11 |
| 9 | 1 | 6  | 3.6 | 3.0 | 1.8 | 1.7E-11 | 1.1E-11 | 2.0E-11 |
| 9 | 1 | 7  | 3.1 | 2.6 | 1.1 | 8.3E-12 | 5.5E-12 | 1.0E-11 |
| 9 | 1 | 8  | 3.0 | 2.4 | 1.3 | 9.1E-12 | 6.0E-12 | 1.1E-11 |
| 9 | 1 | 9  | 3.2 | 2.5 | 2.1 | 1.6E-11 | 1.0E-11 | 1.9E-11 |
| 9 | 1 | 10 | 3.5 | 2.9 | 1.5 | 1.3E-11 | 8.7E-12 | 1.6E-11 |
| 9 | 1 | 13 | 3.1 | 2.6 | 1.3 | 9.7E-12 | 6.4E-12 | 1.2E-11 |
| 9 | 1 | 14 | 3.2 | 2.4 | 1.9 | 1.4E-11 | 9.0E-12 | 1.7E-11 |
| 9 | 1 | 15 | 3.6 | 2.8 | 2.2 | 2.0E-11 | 1.3E-11 | 2.3E-11 |
| 9 | 1 | 16 | 3.6 | 3.0 | 1.9 | 1.8E-11 | 1.2E-11 | 2.1E-11 |

|   |   |    |     |     |     |         |         |         |
|---|---|----|-----|-----|-----|---------|---------|---------|
| 9 | 1 | 17 | 3.2 | 2.7 | 1.6 | 1.3E-11 | 8.4E-12 | 1.5E-11 |
| 9 | 1 | 18 | 3.3 | 2.6 | 1.4 | 1.1E-11 | 7.2E-12 | 1.3E-11 |
| 9 | 1 | 19 | 3.2 | 2.6 | 1.4 | 1.1E-11 | 7.1E-12 | 1.3E-11 |
| 9 | 1 | 20 | 3.5 | 2.8 | 1.7 | 1.5E-11 | 9.7E-12 | 1.7E-11 |
| 9 | 1 | 21 | 3.0 | 2.1 | 2.2 | 1.4E-11 | 9.1E-12 | 1.7E-11 |
| 9 | 1 | 22 | 4.1 | 3.5 | 2.1 | 2.4E-11 | 1.6E-11 | 2.8E-11 |
| 9 | 1 | 23 | 2.8 | 2.5 | 0.7 | 4.7E-12 | 3.1E-12 | 5.8E-12 |
| 9 | 1 | 24 | 3.3 | 2.8 | 1.2 | 9.7E-12 | 6.5E-12 | 1.2E-11 |
| 9 | 1 | 25 | 3.0 | 2.4 | 1.2 | 8.4E-12 | 5.5E-12 | 1.0E-11 |
| 9 | 1 | 26 | 3.4 | 2.9 | 1.3 | 1.2E-11 | 7.8E-12 | 1.4E-11 |
| 9 | 1 | 27 | 3.5 | 2.7 | 2.0 | 1.7E-11 | 1.1E-11 | 2.0E-11 |
| 9 | 1 | 28 | 3.1 | 2.6 | 1.4 | 1.1E-11 | 7.0E-12 | 1.3E-11 |
| 9 | 1 | 29 | 3.4 | 2.9 | 1.3 | 1.1E-11 | 7.4E-12 | 1.3E-11 |
| 9 | 1 | 30 | 3.0 | 2.6 | 1.3 | 9.6E-12 | 6.3E-12 | 1.2E-11 |
| 9 | 1 | 33 | 3.2 | 2.7 | 1.4 | 1.1E-11 | 7.1E-12 | 1.3E-11 |
| 9 | 1 | 34 | 3.6 | 2.8 | 1.6 | 1.4E-11 | 9.7E-12 | 1.7E-11 |
| 9 | 1 | 35 | 3.0 | 2.5 | 1.4 | 1.0E-11 | 6.6E-12 | 1.2E-11 |
| 9 | 2 | 4  | 3.6 | 3.0 | 1.6 | 1.5E-11 | 1.0E-11 | 1.8E-11 |
| 9 | 2 | 7  | 3.1 | 2.6 | 1.3 | 9.8E-12 | 6.4E-12 | 1.2E-11 |
| 9 | 2 | 12 | 3.5 | 2.8 | 2.1 | 1.8E-11 | 1.2E-11 | 2.2E-11 |
| 9 | 2 | 17 | 3.6 | 3.1 | 2.1 | 2.0E-11 | 1.3E-11 | 2.4E-11 |
| 9 | 2 | 21 | 3.7 | 3.1 | 2.3 | 2.2E-11 | 1.5E-11 | 2.6E-11 |
| 9 | 2 | 22 | 3.0 | 2.3 | 1.6 | 1.1E-11 | 7.0E-12 | 1.3E-11 |
| 9 | 2 | 23 | 3.4 | 2.6 | 2.1 | 1.7E-11 | 1.1E-11 | 2.0E-11 |
| 9 | 2 | 24 | 3.7 | 2.7 | 2.7 | 2.3E-11 | 1.5E-11 | 2.7E-11 |
| 9 | 2 | 25 | 3.3 | 2.6 | 1.9 | 1.5E-11 | 9.6E-12 | 1.8E-11 |
| 9 | 2 | 32 | 3.3 | 2.6 | 2.8 | 2.2E-11 | 1.4E-11 | 2.6E-11 |
| 9 | 2 | 34 | 3.3 | 2.7 | 2.0 | 1.6E-11 | 1.1E-11 | 2.0E-11 |
| 9 | 2 | 35 | 3.2 | 2.7 | 2.0 | 1.6E-11 | 1.0E-11 | 1.9E-11 |
| 9 | 2 | 36 | 3.3 | 2.7 | 1.4 | 1.1E-11 | 7.6E-12 | 1.4E-11 |
| 9 | 2 | 37 | 3.3 | 2.6 | 1.7 | 1.3E-11 | 9.0E-12 | 1.6E-11 |
| 9 | 2 | 38 | 3.5 | 2.7 | 3.3 | 2.8E-11 | 1.8E-11 | 3.3E-11 |
| 9 | 2 | 39 | 3.2 | 2.6 | 1.8 | 1.4E-11 | 9.1E-12 | 1.7E-11 |
| 9 | 2 | 40 | 3.2 | 2.8 | 0.7 | 5.8E-12 | 3.8E-12 | 6.9E-12 |
| 9 | 2 | 41 | 3.3 | 2.7 | 1.5 | 1.2E-11 | 8.2E-12 | 1.5E-11 |
| 9 | 2 | 43 | 3.2 | 2.4 | 2.1 | 1.5E-11 | 9.8E-12 | 1.8E-11 |
| 9 | 2 | 45 | 3.3 | 2.7 | 1.7 | 1.4E-11 | 9.1E-12 | 1.6E-11 |

|    |   |    |     |     |     |         |         |         |
|----|---|----|-----|-----|-----|---------|---------|---------|
| 9  | 2 | 46 | 3.6 | 2.9 | 2.8 | 2.5E-11 | 1.7E-11 | 3.0E-11 |
| 9  | 2 | 47 | 3.2 | 2.6 | 1.6 | 1.2E-11 | 8.1E-12 | 1.5E-11 |
| 9  | 2 | 49 | 3.3 | 2.7 | 1.8 | 1.4E-11 | 9.5E-12 | 1.7E-11 |
| 9  | 2 | 50 | 3.6 | 3.0 | 1.7 | 1.6E-11 | 1.1E-11 | 1.9E-11 |
| 9  | 2 | 51 | 3.5 | 2.8 | 1.5 | 1.3E-11 | 8.7E-12 | 1.6E-11 |
| 9  | 2 | 52 | 3.5 | 2.6 | 3.7 | 3.0E-11 | 2.0E-11 | 3.6E-11 |
| 9  | 2 | 53 | 3.6 | 2.9 | 1.7 | 1.5E-11 | 1.0E-11 | 1.8E-11 |
| 9  | 2 | 54 | 3.7 | 2.8 | 3.8 | 3.4E-11 | 2.3E-11 | 4.0E-11 |
| 9  | 2 | 55 | 3.3 | 2.6 | 2.6 | 2.1E-11 | 1.4E-11 | 2.5E-11 |
| 9  | 2 | 56 | 3.6 | 2.9 | 2.8 | 2.6E-11 | 1.7E-11 | 3.0E-11 |
| 9  | 2 | 57 | 3.9 | 3.4 | 1.7 | 1.8E-11 | 1.2E-11 | 2.1E-11 |
| 9  | 2 | 58 | 3.1 | 2.5 | 1.5 | 1.1E-11 | 7.3E-12 | 1.3E-11 |
| 9  | 2 | 59 | 3.4 | 2.8 | 1.8 | 1.5E-11 | 1.0E-11 | 1.8E-11 |
| 9  | 2 | 60 | 3.4 | 2.5 | 2.3 | 1.8E-11 | 1.2E-11 | 2.2E-11 |
| 9  | 2 | 62 | 3.6 | 3.0 | 3.0 | 2.8E-11 | 1.9E-11 | 3.3E-11 |
| 9  | 2 | 64 | 3.4 | 2.8 | 1.8 | 1.5E-11 | 1.0E-11 | 1.8E-11 |
| 9  | 2 | 65 | 4.0 | 3.1 | 3.3 | 3.4E-11 | 2.3E-11 | 4.0E-11 |
| 9  | 2 | 67 | 3.5 | 2.8 | 2.5 | 2.1E-11 | 1.4E-11 | 2.5E-11 |
| 9  | 2 | 68 | 3.0 | 2.6 | 1.1 | 7.9E-12 | 5.2E-12 | 9.5E-12 |
| 9  | 2 | 69 | 3.5 | 2.6 | 2.8 | 2.3E-11 | 1.5E-11 | 2.8E-11 |
| 9  | 2 | 70 | 2.9 | 2.3 | 1.6 | 1.0E-11 | 6.5E-12 | 1.2E-11 |
| 9  | 2 | 71 | 3.6 | 2.8 | 3.2 | 2.8E-11 | 1.9E-11 | 3.4E-11 |
| 9  | 2 | 72 | 3.7 | 3.0 | 2.4 | 2.2E-11 | 1.5E-11 | 2.6E-11 |
| 9  | 2 | 74 | 3.6 | 2.6 | 3.4 | 2.8E-11 | 1.9E-11 | 3.4E-11 |
| 9  | 2 | 75 | 3.6 | 2.8 | 1.9 | 1.7E-11 | 1.1E-11 | 2.0E-11 |
| 11 | 2 | 2  | 3.7 | 3.1 | 2.8 | 2.7E-11 | 1.8E-11 | 3.2E-11 |
| 11 | 2 | 4  | 3.2 | 2.5 | 1.9 | 1.4E-11 | 9.4E-12 | 1.7E-11 |
| 11 | 2 | 5  | 4.0 | 3.4 | 2.4 | 2.6E-11 | 1.8E-11 | 3.1E-11 |
| 11 | 2 | 6  | 3.5 | 2.6 | 2.6 | 2.2E-11 | 1.4E-11 | 2.6E-11 |
| 11 | 2 | 10 | 3.6 | 2.5 | 3.5 | 2.8E-11 | 1.9E-11 | 3.3E-11 |
| 11 | 2 | 11 | 3.8 | 3.0 | 3.1 | 3.0E-11 | 2.0E-11 | 3.5E-11 |
| 11 | 2 | 12 | 3.8 | 2.8 | 3.4 | 3.1E-11 | 2.1E-11 | 3.7E-11 |
| 11 | 2 | 15 | 3.7 | 3.0 | 2.3 | 2.2E-11 | 1.5E-11 | 2.6E-11 |
| 11 | 2 | 17 | 3.7 | 2.9 | 2.7 | 2.5E-11 | 1.7E-11 | 3.0E-11 |
| 11 | 2 | 18 | 4.2 | 2.8 | 4.8 | 4.9E-11 | 3.3E-11 | 5.7E-11 |
| 11 | 2 | 20 | 3.0 | 2.3 | 1.4 | 9.6E-12 | 6.3E-12 | 1.2E-11 |
| 11 | 2 | 21 | 3.4 | 3.0 | 1.3 | 1.2E-11 | 7.9E-12 | 1.4E-11 |

|    |   |    |     |     |     |         |         |         |
|----|---|----|-----|-----|-----|---------|---------|---------|
| 11 | 2 | 26 | 3.6 | 3.0 | 2.1 | 1.9E-11 | 1.3E-11 | 2.3E-11 |
| 11 | 2 | 27 | 3.3 | 2.6 | 2.1 | 1.6E-11 | 1.1E-11 | 2.0E-11 |
| 11 | 2 | 29 | 3.4 | 2.8 | 2.1 | 1.8E-11 | 1.2E-11 | 2.2E-11 |
| 11 | 2 | 30 | 3.8 | 3.4 | 1.4 | 1.5E-11 | 1.0E-11 | 1.8E-11 |
| 11 | 2 | 31 | 3.5 | 2.8 | 2.1 | 1.8E-11 | 1.2E-11 | 2.2E-11 |
| 11 | 2 | 32 | 3.1 | 2.7 | 1.2 | 9.3E-12 | 6.2E-12 | 1.1E-11 |
| 11 | 2 | 34 | 3.5 | 2.7 | 2.4 | 2.0E-11 | 1.3E-11 | 2.4E-11 |
| 11 | 2 | 36 | 4.0 | 3.5 | 3.0 | 3.3E-11 | 2.3E-11 | 3.9E-11 |
| 11 | 2 | 43 | 3.5 | 2.8 | 2.5 | 2.2E-11 | 1.5E-11 | 2.6E-11 |
| 11 | 2 | 47 | 3.6 | 3.1 | 2.1 | 2.0E-11 | 1.4E-11 | 2.4E-11 |
| 11 | 2 | 53 | 3.1 | 2.6 | 1.4 | 1.1E-11 | 7.0E-12 | 1.3E-11 |
| 11 | 2 | 55 | 3.8 | 2.9 | 3.3 | 3.1E-11 | 2.1E-11 | 3.7E-11 |
| 11 | 2 | 58 | 3.6 | 3.0 | 2.9 | 2.7E-11 | 1.9E-11 | 3.3E-11 |
| 11 | 2 | 60 | 3.8 | 3.1 | 2.5 | 2.5E-11 | 1.7E-11 | 2.9E-11 |
| 11 | 2 | 61 | 4.2 | 3.4 | 3.3 | 3.7E-11 | 2.6E-11 | 4.4E-11 |
| 11 | 2 | 62 | 3.0 | 2.5 | 1.3 | 9.5E-12 | 6.3E-12 | 1.2E-11 |
| 11 | 2 | 63 | 3.4 | 2.7 | 1.6 | 1.3E-11 | 8.7E-12 | 1.6E-11 |
| 11 | 2 | 64 | 3.2 | 2.7 | 1.7 | 1.3E-11 | 8.9E-12 | 1.6E-11 |
| 13 | 1 | 3  | 3.8 | 3.1 | 3.6 | 3.5E-11 | 2.3E-11 | 4.1E-11 |
| 13 | 1 | 4  | 3.6 | 3.3 | 0.9 | 9.0E-12 | 6.1E-12 | 1.1E-11 |
| 13 | 1 | 5  | 4.0 | 3.4 | 1.6 | 1.7E-11 | 1.2E-11 | 2.0E-11 |
| 13 | 1 | 6  | 3.5 | 3.0 | 1.9 | 1.7E-11 | 1.1E-11 | 2.0E-11 |
| 13 | 1 | 8  | 3.8 | 3.3 | 2.2 | 2.3E-11 | 1.5E-11 | 2.7E-11 |
| 13 | 1 | 14 | 3.9 | 3.2 | 4.2 | 4.4E-11 | 3.0E-11 | 5.2E-11 |
| 13 | 1 | 15 | 4.0 | 3.5 | 2.0 | 2.2E-11 | 1.5E-11 | 2.6E-11 |
| 13 | 1 | 16 | 3.5 | 3.0 | 2.3 | 2.1E-11 | 1.5E-11 | 2.6E-11 |
| 13 | 1 | 21 | 3.0 | 2.7 | 0.8 | 6.2E-12 | 4.1E-12 | 7.4E-12 |
| 13 | 1 | 22 | 3.3 | 2.9 | 1.7 | 1.4E-11 | 9.5E-12 | 1.7E-11 |
| 13 | 1 | 24 | 4.3 | 3.7 | 2.8 | 3.4E-11 | 2.4E-11 | 4.0E-11 |
| 13 | 1 | 25 | 3.9 | 3.7 | 1.2 | 1.4E-11 | 9.4E-12 | 1.6E-11 |
| 13 | 1 | 27 | 3.5 | 2.9 | 2.2 | 1.9E-11 | 1.3E-11 | 2.3E-11 |
| 13 | 1 | 28 | 3.8 | 2.8 | 3.9 | 3.5E-11 | 2.4E-11 | 4.2E-11 |
| 13 | 1 | 30 | 3.6 | 3.0 | 3.3 | 3.1E-11 | 2.1E-11 | 3.7E-11 |
| 13 | 1 | 32 | 4.0 | 3.2 | 1.6 | 1.6E-11 | 1.1E-11 | 1.9E-11 |
| 13 | 1 | 35 | 3.5 | 2.7 | 4.5 | 3.8E-11 | 2.6E-11 | 4.6E-11 |
| 13 | 1 | 37 | 3.9 | 3.5 | 1.9 | 2.1E-11 | 1.4E-11 | 2.4E-11 |
| 13 | 1 | 39 | 3.4 | 2.9 | 3.2 | 2.8E-11 | 1.9E-11 | 3.3E-11 |



|    |   |    |     |     |     |         |         |         |
|----|---|----|-----|-----|-----|---------|---------|---------|
| 13 | 1 | 41 | 4.1 | 3.1 | 3.2 | 3.3E-11 | 2.3E-11 | 3.9E-11 |
| 13 | 1 | 42 | 3.9 | 3.5 | 1.3 | 1.4E-11 | 9.8E-12 | 1.7E-11 |
| 13 | 1 | 43 | 3.8 | 3.4 | 1.0 | 1.1E-11 | 7.2E-12 | 1.2E-11 |
| 13 | 1 | 44 | 3.1 | 2.9 | 0.4 | 3.3E-12 | 2.2E-12 | 4.0E-12 |
| 13 | 1 | 49 | 3.5 | 3.0 | 1.6 | 1.4E-11 | 9.6E-12 | 1.7E-11 |
| 13 | 1 | 50 | 4.3 | 3.7 | 2.3 | 2.8E-11 | 1.9E-11 | 3.3E-11 |
| 13 | 1 | 52 | 3.1 | 2.4 | 1.5 | 1.1E-11 | 7.1E-12 | 1.3E-11 |
| 13 | 1 | 54 | 3.3 | 2.6 | 2.0 | 1.6E-11 | 1.0E-11 | 1.9E-11 |
| 13 | 1 | 55 | 4.1 | 3.3 | 4.0 | 4.4E-11 | 3.0E-11 | 5.2E-11 |
| 13 | 1 | 59 | 4.0 | 3.4 | 1.4 | 1.5E-11 | 1.0E-11 | 1.8E-11 |
| 13 | 1 | 60 | 3.9 | 3.1 | 2.8 | 2.8E-11 | 1.9E-11 | 3.3E-11 |
| 13 | 1 | 61 | 3.8 | 3.3 | 2.0 | 2.1E-11 | 1.4E-11 | 2.5E-11 |
| 13 | 1 | 63 | 4.0 | 3.2 | 3.4 | 3.5E-11 | 2.4E-11 | 4.2E-11 |
| 13 | 1 | 65 | 3.6 | 3.2 | 1.2 | 1.2E-11 | 7.9E-12 | 1.4E-11 |
| 13 | 1 | 66 | 3.7 | 3.4 | 0.9 | 9.1E-12 | 6.2E-12 | 1.1E-11 |
| 13 | 2 | 1  | 3.9 | 3.2 | 3.2 | 3.3E-11 | 2.3E-11 | 4.0E-11 |
| 13 | 2 | 5  | 4.1 | 3.5 | 2.9 | 3.2E-11 | 2.2E-11 | 3.8E-11 |
| 13 | 2 | 6  | 4.0 | 3.2 | 3.9 | 3.9E-11 | 2.7E-11 | 4.7E-11 |
| 13 | 2 | 7  | 3.7 | 2.9 | 3.8 | 3.5E-11 | 2.4E-11 | 4.2E-11 |
| 13 | 2 | 10 | 3.8 | 3.2 | 2.5 | 2.5E-11 | 1.7E-11 | 3.0E-11 |
| 13 | 2 | 13 | 3.6 | 3.1 | 1.8 | 1.7E-11 | 1.2E-11 | 2.1E-11 |
| 13 | 2 | 15 | 3.2 | 2.6 | 2.4 | 1.8E-11 | 1.2E-11 | 2.2E-11 |
| 13 | 2 | 16 | 3.1 | 2.6 | 2.6 | 1.9E-11 | 1.3E-11 | 2.3E-11 |
| 13 | 2 | 18 | 3.4 | 2.7 | 3.0 | 2.5E-11 | 1.7E-11 | 3.0E-11 |
| 13 | 2 | 20 | 3.7 | 3.0 | 1.7 | 1.6E-11 | 1.1E-11 | 1.9E-11 |
| 13 | 2 | 22 | 3.7 | 2.9 | 2.4 | 2.2E-11 | 1.5E-11 | 2.7E-11 |
| 13 | 2 | 23 | 3.7 | 3.2 | 2.3 | 2.3E-11 | 1.5E-11 | 2.7E-11 |
| 13 | 2 | 24 | 4.2 | 3.3 | 3.1 | 3.4E-11 | 2.4E-11 | 4.1E-11 |
| 13 | 2 | 25 | 3.4 | 3.0 | 1.4 | 1.2E-11 | 8.3E-12 | 1.5E-11 |
| 13 | 2 | 28 | 3.8 | 3.2 | 2.3 | 2.3E-11 | 1.6E-11 | 2.7E-11 |
| 13 | 2 | 29 | 3.9 | 3.2 | 2.6 | 2.7E-11 | 1.8E-11 | 3.2E-11 |
| 13 | 2 | 31 | 3.6 | 3.0 | 3.5 | 3.2E-11 | 2.2E-11 | 3.8E-11 |
| 13 | 2 | 33 | 4.3 | 3.3 | 4.2 | 4.8E-11 | 3.3E-11 | 5.6E-11 |
| 13 | 2 | 34 | 3.7 | 2.6 | 3.9 | 3.4E-11 | 2.3E-11 | 4.0E-11 |
| 13 | 2 | 35 | 3.6 | 2.7 | 3.5 | 3.1E-11 | 2.1E-11 | 3.7E-11 |
| 13 | 2 | 36 | 3.2 | 2.5 | 1.6 | 1.2E-11 | 8.1E-12 | 1.5E-11 |
| 13 | 2 | 37 | 3.6 | 3.0 | 1.7 | 1.6E-11 | 1.1E-11 | 1.9E-11 |

|    |   |    |     |     |     |         |         |         |
|----|---|----|-----|-----|-----|---------|---------|---------|
| 13 | 2 | 38 | 3.9 | 3.5 | 2.1 | 2.3E-11 | 1.6E-11 | 2.7E-11 |
| 13 | 2 | 39 | 3.7 | 3.1 | 2.2 | 2.1E-11 | 1.4E-11 | 2.5E-11 |
| 13 | 2 | 40 | 4.0 | 3.5 | 2.6 | 2.9E-11 | 2.0E-11 | 3.4E-11 |
| 13 | 2 | 41 | 3.4 | 2.9 | 1.7 | 1.5E-11 | 9.8E-12 | 1.7E-11 |
| 13 | 2 | 42 | 4.2 | 3.3 | 3.9 | 4.4E-11 | 3.0E-11 | 5.1E-11 |
| 13 | 2 | 43 | 3.5 | 3.1 | 2.0 | 1.9E-11 | 1.3E-11 | 2.2E-11 |
| 13 | 2 | 44 | 3.6 | 3.2 | 1.8 | 1.7E-11 | 1.2E-11 | 2.0E-11 |
| 13 | 2 | 45 | 3.8 | 3.3 | 1.9 | 2.0E-11 | 1.3E-11 | 2.3E-11 |
| 13 | 2 | 46 | 3.4 | 2.9 | 1.6 | 1.4E-11 | 9.1E-12 | 1.6E-11 |
| 13 | 2 | 47 | 3.8 | 3.2 | 2.1 | 2.1E-11 | 1.4E-11 | 2.5E-11 |
| 13 | 2 | 50 | 4.1 | 3.5 | 2.5 | 2.8E-11 | 1.9E-11 | 3.3E-11 |
| 13 | 2 | 51 | 3.2 | 2.7 | 1.4 | 1.1E-11 | 7.2E-12 | 1.3E-11 |
| 13 | 2 | 53 | 3.6 | 2.7 | 3.3 | 2.8E-11 | 1.9E-11 | 3.4E-11 |
| 13 | 2 | 54 | 3.2 | 2.7 | 1.0 | 7.9E-12 | 5.2E-12 | 9.5E-12 |
| 13 | 2 | 55 | 3.4 | 2.9 | 2.3 | 1.9E-11 | 1.3E-11 | 2.3E-11 |
| 13 | 2 | 57 | 3.5 | 2.9 | 2.3 | 2.0E-11 | 1.3E-11 | 2.4E-11 |
| 13 | 2 | 59 | 3.2 | 2.7 | 1.4 | 1.1E-11 | 7.2E-12 | 1.3E-11 |
| 13 | 2 | 60 | 3.7 | 3.0 | 2.5 | 2.4E-11 | 1.6E-11 | 2.8E-11 |
| 13 | 2 | 61 | 3.6 | 3.1 | 2.1 | 2.0E-11 | 1.3E-11 | 2.4E-11 |
| 13 | 2 | 63 | 3.5 | 2.9 | 1.7 | 1.5E-11 | 1.0E-11 | 1.8E-11 |
| 15 | 1 | 10 | 4.7 | 4.0 | 5.5 | 7.5E-11 | 5.3E-11 | 8.7E-11 |
| 15 | 1 | 12 | 4.0 | 3.4 | 3.2 | 3.4E-11 | 2.4E-11 | 4.1E-11 |
| 15 | 1 | 13 | 4.0 | 3.3 | 3.5 | 3.7E-11 | 2.6E-11 | 4.4E-11 |
| 15 | 1 | 14 | 4.2 | 3.3 | 5.4 | 5.9E-11 | 4.1E-11 | 7.0E-11 |
| 15 | 1 | 15 | 3.7 | 2.5 | 5.7 | 4.7E-11 | 3.1E-11 | 5.6E-11 |
| 15 | 1 | 19 | 3.2 | 2.2 | 3.4 | 2.3E-11 | 1.5E-11 | 2.8E-11 |
| 15 | 1 | 20 | 3.8 | 3.2 | 3.2 | 3.2E-11 | 2.2E-11 | 3.8E-11 |
| 15 | 1 | 26 | 4.0 | 3.3 | 4.2 | 4.5E-11 | 3.1E-11 | 5.3E-11 |
| 15 | 1 | 27 | 4.4 | 3.7 | 5.6 | 6.8E-11 | 4.8E-11 | 8.0E-11 |
| 15 | 1 | 32 | 3.7 | 2.8 | 4.3 | 3.9E-11 | 2.6E-11 | 4.7E-11 |
| 15 | 1 | 33 | 4.4 | 3.4 | 6.7 | 7.8E-11 | 5.4E-11 | 9.1E-11 |
| 15 | 1 | 36 | 4.0 | 3.3 | 4.6 | 4.9E-11 | 3.4E-11 | 5.8E-11 |
| 15 | 1 | 39 | 3.5 | 3.0 | 2.8 | 2.5E-11 | 1.7E-11 | 3.0E-11 |
| 15 | 1 | 42 | 3.7 | 2.9 | 4.5 | 4.1E-11 | 2.8E-11 | 4.9E-11 |
| 15 | 1 | 45 | 3.5 | 3.0 | 3.0 | 2.7E-11 | 1.8E-11 | 3.3E-11 |
| 15 | 1 | 48 | 3.5 | 2.8 | 3.1 | 2.7E-11 | 1.8E-11 | 3.2E-11 |
| 15 | 1 | 53 | 3.3 | 2.7 | 3.9 | 3.1E-11 | 2.1E-11 | 3.8E-11 |

|    |   |    |     |     |     |         |         |         |
|----|---|----|-----|-----|-----|---------|---------|---------|
| 15 | 1 | 54 | 3.9 | 3.1 | 2.9 | 3.0E-11 | 2.0E-11 | 3.5E-11 |
| 15 | 1 | 55 | 3.7 | 2.5 | 4.8 | 3.9E-11 | 2.6E-11 | 4.7E-11 |
| 15 | 1 | 59 | 3.5 | 2.9 | 2.9 | 2.6E-11 | 1.7E-11 | 3.1E-11 |
| 15 | 1 | 60 | 3.1 | 2.6 | 2.2 | 1.6E-11 | 1.1E-11 | 2.0E-11 |
| 15 | 1 | 64 | 3.8 | 3.1 | 3.7 | 3.6E-11 | 2.5E-11 | 4.3E-11 |
| 15 | 1 | 65 | 3.7 | 2.7 | 3.3 | 2.8E-11 | 1.9E-11 | 3.4E-11 |
| 15 | 1 | 66 | 3.8 | 3.2 | 4.3 | 4.2E-11 | 2.9E-11 | 5.0E-11 |
| 15 | 1 | 70 | 3.8 | 3.1 | 3.2 | 3.1E-11 | 2.1E-11 | 3.7E-11 |
| 15 | 1 | 71 | 3.5 | 2.8 | 3.9 | 3.4E-11 | 2.3E-11 | 4.0E-11 |
| 15 | 1 | 72 | 3.8 | 3.0 | 5.3 | 5.1E-11 | 3.5E-11 | 6.1E-11 |
| 15 | 1 | 75 | 3.6 | 3.1 | 3.7 | 3.5E-11 | 2.4E-11 | 4.2E-11 |
| 15 | 1 | 77 | 3.7 | 3.1 | 3.1 | 3.0E-11 | 2.0E-11 | 3.6E-11 |
| 15 | 1 | 79 | 4.1 | 3.4 | 3.6 | 3.9E-11 | 2.7E-11 | 4.6E-11 |
| 15 | 1 | 80 | 4.0 | 3.0 | 7.6 | 7.7E-11 | 5.3E-11 | 9.1E-11 |
| 15 | 1 | 81 | 3.2 | 2.5 | 2.7 | 1.9E-11 | 1.3E-11 | 2.3E-11 |
| 15 | 1 | 82 | 3.9 | 3.4 | 3.0 | 3.2E-11 | 2.2E-11 | 3.8E-11 |
| 15 | 1 | 84 | 3.1 | 2.4 | 3.3 | 2.3E-11 | 1.5E-11 | 2.7E-11 |
| 15 | 1 | 87 | 4.0 | 3.4 | 4.2 | 4.6E-11 | 3.2E-11 | 5.4E-11 |
| 15 | 1 | 88 | 3.9 | 3.1 | 4.7 | 4.6E-11 | 3.2E-11 | 5.5E-11 |
| 15 | 1 | 94 | 4.0 | 3.4 | 5.4 | 5.8E-11 | 4.0E-11 | 6.8E-11 |
| 15 | 2 | 1  | 3.8 | 3.1 | 4.3 | 4.1E-11 | 2.8E-11 | 4.9E-11 |
| 15 | 2 | 2  | 4.2 | 3.4 | 4.0 | 4.5E-11 | 3.1E-11 | 5.3E-11 |
| 15 | 2 | 3  | 3.6 | 2.8 | 2.6 | 2.3E-11 | 1.6E-11 | 2.8E-11 |
| 15 | 2 | 6  | 4.0 | 3.2 | 3.6 | 3.8E-11 | 2.6E-11 | 4.5E-11 |
| 15 | 2 | 8  | 3.9 | 3.2 | 3.4 | 3.5E-11 | 2.4E-11 | 4.1E-11 |
| 15 | 2 | 9  | 3.2 | 2.6 | 1.8 | 1.4E-11 | 9.1E-12 | 1.7E-11 |
| 15 | 2 | 10 | 3.5 | 2.9 | 2.2 | 2.0E-11 | 1.3E-11 | 2.4E-11 |
| 15 | 2 | 12 | 4.1 | 3.2 | 5.3 | 5.5E-11 | 3.8E-11 | 6.5E-11 |
| 15 | 2 | 13 | 3.4 | 2.7 | 3.0 | 2.4E-11 | 1.6E-11 | 2.9E-11 |
| 15 | 2 | 16 | 3.7 | 3.1 | 2.1 | 2.0E-11 | 1.4E-11 | 2.4E-11 |
| 15 | 2 | 17 | 4.0 | 3.1 | 3.2 | 3.2E-11 | 2.2E-11 | 3.8E-11 |
| 15 | 2 | 23 | 4.2 | 3.5 | 3.8 | 4.4E-11 | 3.1E-11 | 5.2E-11 |
| 15 | 2 | 24 | 3.3 | 2.5 | 3.4 | 2.5E-11 | 1.7E-11 | 3.0E-11 |
| 15 | 2 | 25 | 4.0 | 2.9 | 4.1 | 4.1E-11 | 2.8E-11 | 4.9E-11 |
| 15 | 2 | 26 | 4.5 | 3.5 | 4.5 | 5.5E-11 | 3.8E-11 | 6.4E-11 |
| 15 | 2 | 27 | 3.8 | 3.1 | 3.4 | 3.4E-11 | 2.3E-11 | 4.0E-11 |
| 15 | 2 | 28 | 3.8 | 3.1 | 3.4 | 3.3E-11 | 2.3E-11 | 3.9E-11 |

|    |   |    |     |     |     |         |         |         |
|----|---|----|-----|-----|-----|---------|---------|---------|
| 15 | 2 | 29 | 3.4 | 2.8 | 2.7 | 2.3E-11 | 1.5E-11 | 2.7E-11 |
| 15 | 2 | 30 | 3.5 | 2.9 | 1.7 | 1.5E-11 | 1.0E-11 | 1.8E-11 |
| 15 | 2 | 34 | 3.6 | 2.8 | 3.3 | 2.9E-11 | 1.9E-11 | 3.4E-11 |
| 15 | 2 | 35 | 4.3 | 3.6 | 4.6 | 5.5E-11 | 3.8E-11 | 6.4E-11 |
| 15 | 2 | 36 | 4.1 | 3.1 | 4.4 | 4.6E-11 | 3.1E-11 | 5.4E-11 |
| 15 | 2 | 37 | 3.5 | 2.3 | 3.4 | 2.5E-11 | 1.7E-11 | 3.1E-11 |
| 15 | 2 | 38 | 4.0 | 3.0 | 5.5 | 5.6E-11 | 3.8E-11 | 6.6E-11 |
| 15 | 2 | 39 | 4.2 | 3.4 | 3.8 | 4.3E-11 | 3.0E-11 | 5.1E-11 |
| 15 | 2 | 40 | 3.5 | 2.9 | 2.1 | 1.8E-11 | 1.2E-11 | 2.2E-11 |
| 15 | 2 | 45 | 3.5 | 2.9 | 1.9 | 1.7E-11 | 1.1E-11 | 2.0E-11 |
| 15 | 2 | 47 | 3.9 | 3.3 | 1.7 | 1.8E-11 | 1.2E-11 | 2.1E-11 |
| 15 | 2 | 51 | 3.2 | 2.6 | 2.1 | 1.6E-11 | 1.1E-11 | 2.0E-11 |
| 15 | 2 | 53 | 3.2 | 2.3 | 3.5 | 2.4E-11 | 1.6E-11 | 3.0E-11 |
| 15 | 2 | 54 | 3.1 | 2.2 | 4.1 | 2.7E-11 | 1.8E-11 | 3.3E-11 |
| 15 | 2 | 61 | 3.7 | 2.9 | 3.0 | 2.8E-11 | 1.9E-11 | 3.4E-11 |
| 15 | 2 | 62 | 3.6 | 2.7 | 3.2 | 2.7E-11 | 1.8E-11 | 3.3E-11 |
| 15 | 2 | 63 | 3.8 | 3.4 | 1.9 | 2.0E-11 | 1.4E-11 | 2.4E-11 |
| 15 | 2 | 64 | 3.6 | 2.7 | 3.4 | 2.9E-11 | 1.9E-11 | 3.5E-11 |
| 15 | 2 | 66 | 4.1 | 3.4 | 4.4 | 4.9E-11 | 3.4E-11 | 5.7E-11 |
| 15 | 2 | 67 | 3.7 | 2.9 | 4.1 | 3.9E-11 | 2.6E-11 | 4.6E-11 |
| 15 | 2 | 68 | 3.3 | 2.6 | 2.1 | 1.6E-11 | 1.1E-11 | 2.0E-11 |
| 15 | 2 | 69 | 3.5 | 2.7 | 2.9 | 2.5E-11 | 1.7E-11 | 3.0E-11 |
| 15 | 2 | 72 | 3.8 | 3.4 | 1.7 | 1.8E-11 | 1.2E-11 | 2.1E-11 |
| 15 | 2 | 73 | 3.7 | 3.2 | 2.7 | 2.7E-11 | 1.8E-11 | 3.2E-11 |
| 15 | 2 | 77 | 3.2 | 2.3 | 2.5 | 1.8E-11 | 1.2E-11 | 2.1E-11 |
| 15 | 2 | 78 | 3.8 | 3.2 | 3.4 | 3.4E-11 | 2.3E-11 | 4.0E-11 |
| 15 | 2 | 79 | 4.6 | 3.6 | 4.5 | 5.7E-11 | 4.0E-11 | 6.6E-11 |
| 17 | 2 | 2  | 4.6 | 4.2 | 2.4 | 3.3E-11 | 2.4E-11 | 3.9E-11 |
| 17 | 2 | 3  | 4.3 | 3.5 | 5.1 | 6.0E-11 | 4.2E-11 | 7.0E-11 |
| 17 | 2 | 7  | 4.1 | 3.2 | 4.8 | 5.1E-11 | 3.5E-11 | 6.1E-11 |
| 17 | 2 | 8  | 3.8 | 3.1 | 5.9 | 5.8E-11 | 3.9E-11 | 6.9E-11 |
| 17 | 2 | 9  | 3.7 | 3.0 | 2.7 | 2.6E-11 | 1.7E-11 | 3.0E-11 |
| 17 | 2 | 10 | 3.3 | 2.6 | 2.8 | 2.2E-11 | 1.4E-11 | 2.6E-11 |
| 17 | 2 | 13 | 3.5 | 2.7 | 1.9 | 1.6E-11 | 1.1E-11 | 1.9E-11 |
| 17 | 2 | 15 | 3.5 | 2.9 | 3.1 | 2.7E-11 | 1.8E-11 | 3.3E-11 |
| 17 | 2 | 17 | 4.0 | 3.1 | 4.1 | 4.2E-11 | 2.9E-11 | 5.0E-11 |
| 17 | 2 | 18 | 4.2 | 3.5 | 3.0 | 3.5E-11 | 2.4E-11 | 4.1E-11 |

|    |   |     |     |     |     |         |         |         |
|----|---|-----|-----|-----|-----|---------|---------|---------|
| 17 | 2 | 19  | 3.9 | 3.5 | 2.6 | 2.8E-11 | 2.0E-11 | 3.4E-11 |
| 17 | 2 | 22  | 3.8 | 3.2 | 3.3 | 3.4E-11 | 2.3E-11 | 4.0E-11 |
| 17 | 2 | 23  | 3.6 | 3.1 | 2.7 | 2.5E-11 | 1.7E-11 | 3.0E-11 |
| 17 | 2 | 24  | 4.2 | 3.2 | 3.1 | 3.4E-11 | 2.3E-11 | 4.0E-11 |
| 17 | 2 | 25  | 4.2 | 3.3 | 4.9 | 5.4E-11 | 3.7E-11 | 6.4E-11 |
| 17 | 2 | 28  | 4.2 | 3.4 | 4.0 | 4.5E-11 | 3.1E-11 | 5.3E-11 |
| 17 | 2 | 29  | 3.1 | 2.7 | 1.5 | 1.2E-11 | 7.8E-12 | 1.4E-11 |
| 17 | 2 | 30  | 3.8 | 3.3 | 3.6 | 3.7E-11 | 2.5E-11 | 4.3E-11 |
| 17 | 2 | 34  | 3.3 | 2.6 | 2.7 | 2.1E-11 | 1.4E-11 | 2.6E-11 |
| 17 | 2 | 38  | 3.4 | 2.7 | 3.5 | 2.9E-11 | 1.9E-11 | 3.5E-11 |
| 17 | 2 | 41  | 3.7 | 3.0 | 3.6 | 3.4E-11 | 2.3E-11 | 4.1E-11 |
| 17 | 2 | 42  | 4.4 | 3.7 | 4.5 | 5.5E-11 | 3.9E-11 | 6.5E-11 |
| 17 | 2 | 53  | 4.3 | 3.4 | 4.5 | 5.1E-11 | 3.5E-11 | 6.0E-11 |
| 17 | 2 | 58  | 4.2 | 3.4 | 3.4 | 3.8E-11 | 2.6E-11 | 4.5E-11 |
| 17 | 2 | 59  | 4.1 | 3.4 | 3.0 | 3.3E-11 | 2.3E-11 | 3.9E-11 |
| 17 | 2 | 60  | 4.4 | 3.4 | 3.8 | 4.4E-11 | 3.1E-11 | 5.2E-11 |
| 17 | 2 | 63  | 3.5 | 2.6 | 3.4 | 2.7E-11 | 1.8E-11 | 3.3E-11 |
| 17 | 2 | 64  | 3.1 | 2.7 | 1.2 | 9.2E-12 | 6.1E-12 | 1.1E-11 |
| 17 | 2 | 65  | 4.3 | 3.3 | 5.9 | 6.6E-11 | 4.6E-11 | 7.8E-11 |
| 17 | 2 | 67  | 3.9 | 3.0 | 3.5 | 3.4E-11 | 2.3E-11 | 4.1E-11 |
| 17 | 2 | 68  | 3.9 | 3.3 | 3.6 | 3.7E-11 | 2.5E-11 | 4.4E-11 |
| 17 | 2 | 70  | 3.9 | 3.4 | 3.6 | 3.8E-11 | 2.6E-11 | 4.5E-11 |
| 17 | 2 | 71  | 3.5 | 2.9 | 2.6 | 2.3E-11 | 1.5E-11 | 2.7E-11 |
| 17 | 2 | 74  | 4.1 | 3.1 | 5.9 | 6.2E-11 | 4.2E-11 | 7.3E-11 |
| 17 | 2 | 77  | 4.3 | 3.5 | 5.0 | 5.8E-11 | 4.0E-11 | 6.8E-11 |
| 17 | 2 | 78  | 3.9 | 3.2 | 3.9 | 4.1E-11 | 2.8E-11 | 4.8E-11 |
| 17 | 2 | 91  | 4.4 | 3.5 | 4.1 | 4.9E-11 | 3.4E-11 | 5.7E-11 |
| 17 | 2 | 92  | 3.5 | 3.0 | 2.3 | 2.1E-11 | 1.4E-11 | 2.5E-11 |
| 17 | 2 | 96  | 3.9 | 3.2 | 2.6 | 2.7E-11 | 1.9E-11 | 3.2E-11 |
| 17 | 2 | 100 | 3.7 | 2.8 | 2.9 | 2.6E-11 | 1.8E-11 | 3.1E-11 |
| 17 | 2 | 105 | 3.7 | 2.9 | 3.7 | 3.3E-11 | 2.2E-11 | 3.9E-11 |
| 17 | 2 | 106 | 4.3 | 3.7 | 2.7 | 3.3E-11 | 2.3E-11 | 3.8E-11 |
| 17 | 2 | 107 | 3.3 | 2.7 | 3.0 | 2.5E-11 | 1.6E-11 | 3.0E-11 |
| 17 | 2 | 108 | 3.8 | 3.1 | 3.3 | 3.2E-11 | 2.2E-11 | 3.8E-11 |
| 17 | 2 | 109 | 3.5 | 2.7 | 3.5 | 3.0E-11 | 2.0E-11 | 3.6E-11 |
| 17 | 2 | 110 | 3.9 | 3.1 | 2.9 | 2.9E-11 | 2.0E-11 | 3.4E-11 |

**C.braudii**

| Day | Experiment no. | particle no. | initial $r_{\text{eff}}(\mu\text{m})$ | end $r_{\text{eff}}(\mu\text{m})$ | Dissolution time(s) | CaCO <sub>3</sub> (Rf = 4) / g | CaCO <sub>3</sub> (Rf = 2) / g | CaCO <sub>3</sub> (Rf = 6) / g |
|-----|----------------|--------------|---------------------------------------|-----------------------------------|---------------------|--------------------------------|--------------------------------|--------------------------------|
| 1   | 1              | 1            | 9.5                                   | 6.8                               | 21.3                | 3.5E-09                        | 2.7E-09                        | 3.8E-09                        |
| 1   | 1              | 4            | 10.2                                  | 7.4                               | 23.3                | 4.2E-09                        | 3.4E-09                        | 4.6E-09                        |
| 1   | 1              | 5            | 9.0                                   | 5.7                               | 22.4                | 3.3E-09                        | 2.6E-09                        | 3.6E-09                        |
| 1   | 1              | 6            | 9.4                                   | 6.9                               | 15.4                | 2.6E-09                        | 2.0E-09                        | 2.8E-09                        |
| 1   | 1              | 7            | 10.2                                  | 7.3                               | 25.9                | 4.7E-09                        | 3.8E-09                        | 5.2E-09                        |
| 1   | 1              | 8            | 10.3                                  | 7.8                               | 15.9                | 3.0E-09                        | 2.4E-09                        | 3.2E-09                        |
| 1   | 1              | 9            | 10.3                                  | 7.5                               | 21.2                | 3.8E-09                        | 3.0E-09                        | 4.2E-09                        |
| 1   | 1              | 10           | 10.8                                  | 8.0                               | 27.8                | 5.5E-09                        | 4.4E-09                        | 6.0E-09                        |
| 1   | 1              | 11           | 9.3                                   | 7.0                               | 20.8                | 3.4E-09                        | 2.7E-09                        | 3.7E-09                        |
| 1   | 1              | 12           | 10.9                                  | 7.8                               | 27.3                | 5.3E-09                        | 4.3E-09                        | 5.8E-09                        |
| 1   | 1              | 13           | 11.1                                  | 7.8                               | 27.9                | 5.4E-09                        | 4.3E-09                        | 5.8E-09                        |
| 1   | 1              | 14           | 9.5                                   | 6.8                               | 20.2                | 3.3E-09                        | 2.6E-09                        | 3.6E-09                        |
| 1   | 1              | 15           | 10.0                                  | 6.5                               | 26.1                | 4.2E-09                        | 3.3E-09                        | 4.6E-09                        |
| 1   | 1              | 18           | 10.0                                  | 6.7                               | 24.2                | 4.1E-09                        | 3.2E-09                        | 4.5E-09                        |
| 1   | 1              | 19           | 10.9                                  | 8.5                               | 21.5                | 4.4E-09                        | 3.5E-09                        | 4.7E-09                        |
| 1   | 1              | 20           | 9.8                                   | 6.9                               | 21.5                | 3.5E-09                        | 2.8E-09                        | 3.9E-09                        |
| 1   | 1              | 21           | 10.4                                  | 7.5                               | 22.6                | 4.2E-09                        | 3.4E-09                        | 4.6E-09                        |
| 1   | 1              | 22           | 10.6                                  | 7.9                               | 23.4                | 4.5E-09                        | 3.6E-09                        | 4.9E-09                        |
| 1   | 1              | 23           | 8.9                                   | 6.5                               | 15.7                | 2.4E-09                        | 1.9E-09                        | 2.7E-09                        |
| 1   | 1              | 24           | 10.0                                  | 7.0                               | 19.3                | 3.4E-09                        | 2.7E-09                        | 3.7E-09                        |
| 1   | 1              | 25           | 9.3                                   | 6.4                               | 19.4                | 3.0E-09                        | 2.4E-09                        | 3.3E-09                        |
| 1   | 1              | 29           | 9.3                                   | 6.5                               | 18.1                | 2.8E-09                        | 2.2E-09                        | 3.1E-09                        |
| 1   | 1              | 30           | 11.0                                  | 7.4                               | 27.4                | 5.2E-09                        | 4.2E-09                        | 5.7E-09                        |
| 1   | 1              | 31           | 9.5                                   | 6.9                               | 14.5                | 2.4E-09                        | 1.9E-09                        | 2.6E-09                        |
| 1   | 3              | 1            | 9.8                                   | 7.4                               | 16.7                | 2.9E-09                        | 2.3E-09                        | 3.2E-09                        |
| 1   | 3              | 2            | 9.8                                   | 6.9                               | 19.9                | 3.3E-09                        | 2.6E-09                        | 3.6E-09                        |
| 1   | 3              | 3            | 9.6                                   | 7.1                               | 14.8                | 2.5E-09                        | 2.0E-09                        | 2.7E-09                        |
| 1   | 3              | 5            | 10.7                                  | 8.0                               | 19.0                | 3.7E-09                        | 3.0E-09                        | 4.0E-09                        |
| 1   | 3              | 6            | 10.4                                  | 7.5                               | 20.9                | 3.7E-09                        | 3.0E-09                        | 4.1E-09                        |
| 1   | 3              | 7            | 9.0                                   | 3.8                               | 16.8                | 2.0E-09                        | 1.5E-09                        | 2.2E-09                        |
| 1   | 3              | 8            | 10.0                                  | 7.4                               | 18.3                | 3.2E-09                        | 2.5E-09                        | 3.5E-09                        |
| 1   | 3              | 9            | 10.1                                  | 7.4                               | 22.5                | 4.0E-09                        | 3.1E-09                        | 4.3E-09                        |
| 1   | 3              | 10           | 10.8                                  | 8.1                               | 17.6                | 3.4E-09                        | 2.8E-09                        | 3.7E-09                        |
| 1   | 3              | 11           | 10.3                                  | 7.7                               | 18.8                | 3.4E-09                        | 2.8E-09                        | 3.8E-09                        |
| 1   | 3              | 12           | 9.1                                   | 7.0                               | 9.9                 | 1.6E-09                        | 1.3E-09                        | 1.8E-09                        |
| 3   | 1              | 1            | 9.5                                   | 6.7                               | 13.6                | 2.2E-09                        | 1.7E-09                        | 2.4E-09                        |

|   |   |    |      |     |      |         |         |         |
|---|---|----|------|-----|------|---------|---------|---------|
| 3 | 1 | 2  | 9.5  | 6.2 | 23.7 | 3.4E-09 | 2.7E-09 | 3.8E-09 |
| 3 | 1 | 3  | 9.9  | 7.0 | 16.6 | 2.7E-09 | 2.2E-09 | 3.0E-09 |
| 3 | 1 | 6  | 10.2 | 7.0 | 25.9 | 4.4E-09 | 3.5E-09 | 4.8E-09 |
| 3 | 1 | 8  | 10.3 | 7.5 | 20.8 | 3.7E-09 | 2.9E-09 | 4.0E-09 |
| 3 | 1 | 9  | 9.0  | 6.2 | 20.9 | 2.9E-09 | 2.2E-09 | 3.2E-09 |
| 3 | 1 | 10 | 10.4 | 7.8 | 13.2 | 2.4E-09 | 1.9E-09 | 2.6E-09 |
| 3 | 1 | 12 | 9.6  | 7.1 | 17.4 | 2.8E-09 | 2.2E-09 | 3.1E-09 |
| 3 | 1 | 14 | 10.1 | 7.1 | 21.8 | 3.7E-09 | 3.0E-09 | 4.1E-09 |
| 3 | 1 | 15 | 10.2 | 7.3 | 13.9 | 2.5E-09 | 2.0E-09 | 2.8E-09 |
| 3 | 1 | 18 | 9.4  | 6.9 | 9.7  | 1.6E-09 | 1.2E-09 | 1.7E-09 |
| 3 | 1 | 19 | 9.5  | 6.8 | 15.4 | 2.5E-09 | 2.0E-09 | 2.7E-09 |
| 3 | 2 | 1  | 10.2 | 7.9 | 15.1 | 2.8E-09 | 2.3E-09 | 3.1E-09 |
| 3 | 2 | 3  | 9.5  | 6.7 | 15.8 | 2.6E-09 | 2.1E-09 | 2.9E-09 |
| 3 | 2 | 6  | 9.8  | 7.2 | 18.0 | 3.1E-09 | 2.4E-09 | 3.4E-09 |
| 3 | 2 | 7  | 11.0 | 8.0 | 23.7 | 4.7E-09 | 3.8E-09 | 5.1E-09 |
| 3 | 2 | 8  | 11.3 | 8.1 | 27.5 | 5.6E-09 | 4.6E-09 | 6.1E-09 |
| 3 | 2 | 9  | 10.0 | 7.2 | 19.2 | 3.4E-09 | 2.7E-09 | 3.7E-09 |
| 3 | 2 | 10 | 9.7  | 6.8 | 21.5 | 3.5E-09 | 2.8E-09 | 3.9E-09 |
| 3 | 2 | 11 | 9.3  | 6.4 | 17.0 | 2.7E-09 | 2.1E-09 | 2.9E-09 |
| 3 | 2 | 12 | 10.8 | 8.0 | 20.5 | 3.9E-09 | 3.2E-09 | 4.3E-09 |
| 3 | 2 | 13 | 10.9 | 7.9 | 24.7 | 4.6E-09 | 3.7E-09 | 5.0E-09 |
| 3 | 2 | 14 | 9.7  | 6.7 | 20.2 | 3.2E-09 | 2.5E-09 | 3.5E-09 |
| 3 | 2 | 15 | 10.7 | 8.1 | 16.0 | 3.0E-09 | 2.4E-09 | 3.3E-09 |
| 3 | 2 | 16 | 10.2 | 7.2 | 19.9 | 3.5E-09 | 2.7E-09 | 3.8E-09 |
| 3 | 2 | 17 | 8.6  | 6.2 | 9.8  | 1.5E-09 | 1.1E-09 | 1.6E-09 |
| 5 | 1 | 1  | 12.0 | 9.5 | 15.5 | 3.5E-09 | 2.9E-09 | 3.8E-09 |
| 5 | 1 | 2  | 10.1 | 7.7 | 17.0 | 3.1E-09 | 2.5E-09 | 3.4E-09 |
| 5 | 1 | 4  | 10.2 | 8.2 | 17.9 | 3.4E-09 | 2.8E-09 | 3.8E-09 |
| 5 | 1 | 5  | 9.4  | 6.7 | 19.2 | 3.1E-09 | 2.4E-09 | 3.4E-09 |
| 5 | 1 | 10 | 10.6 | 7.4 | 23.1 | 4.3E-09 | 3.4E-09 | 4.7E-09 |
| 5 | 1 | 11 | 10.5 | 7.8 | 15.4 | 2.8E-09 | 2.3E-09 | 3.1E-09 |
| 5 | 1 | 12 | 8.3  | 6.2 | 14.8 | 2.0E-09 | 1.5E-09 | 2.2E-09 |
| 5 | 1 | 13 | 11.3 | 8.7 | 16.6 | 3.5E-09 | 2.8E-09 | 3.8E-09 |
| 5 | 1 | 14 | 9.7  | 6.6 | 20.6 | 3.4E-09 | 2.7E-09 | 3.7E-09 |
| 5 | 1 | 15 | 10.0 | 7.5 | 12.3 | 2.3E-09 | 1.8E-09 | 2.5E-09 |
| 5 | 1 | 16 | 9.6  | 7.1 | 12.1 | 2.0E-09 | 1.6E-09 | 2.2E-09 |
| 5 | 1 | 18 | 11.2 | 7.7 | 26.1 | 4.9E-09 | 4.0E-09 | 5.4E-09 |

|   |   |    |      |     |      |         |         |         |
|---|---|----|------|-----|------|---------|---------|---------|
| 5 | 1 | 20 | 12.0 | 9.1 | 31.7 | 7.2E-09 | 5.9E-09 | 7.8E-09 |
| 5 | 1 | 21 | 9.0  | 6.7 | 18.4 | 2.8E-09 | 2.2E-09 | 3.1E-09 |
| 5 | 2 | 1  | 9.4  | 6.8 | 14.9 | 2.4E-09 | 1.9E-09 | 2.6E-09 |
| 5 | 2 | 2  | 10.0 | 7.2 | 18.2 | 3.0E-09 | 2.4E-09 | 3.3E-09 |
| 5 | 2 | 3  | 11.7 | 8.5 | 20.8 | 4.4E-09 | 3.5E-09 | 4.7E-09 |
| 5 | 2 | 4  | 8.9  | 6.0 | 14.8 | 2.1E-09 | 1.6E-09 | 2.3E-09 |
| 5 | 2 | 5  | 9.6  | 7.0 | 17.3 | 2.7E-09 | 2.1E-09 | 3.0E-09 |
| 5 | 2 | 8  | 10.2 | 7.2 | 21.8 | 3.8E-09 | 3.0E-09 | 4.1E-09 |
| 5 | 2 | 9  | 10.2 | 7.2 | 20.3 | 3.5E-09 | 2.8E-09 | 3.9E-09 |
| 5 | 2 | 10 | 12.2 | 8.7 | 21.8 | 4.8E-09 | 3.9E-09 | 5.1E-09 |
| 5 | 2 | 11 | 9.6  | 6.9 | 15.5 | 2.5E-09 | 2.0E-09 | 2.8E-09 |
| 5 | 2 | 12 | 12.4 | 7.9 | 28.4 | 5.8E-09 | 4.7E-09 | 6.3E-09 |
| 5 | 2 | 13 | 8.3  | 5.9 | 20.0 | 2.6E-09 | 2.0E-09 | 2.9E-09 |
| 5 | 2 | 14 | 9.3  | 6.4 | 17.5 | 2.7E-09 | 2.1E-09 | 2.9E-09 |
| 5 | 2 | 15 | 10.3 | 7.1 | 24.9 | 4.3E-09 | 3.4E-09 | 4.7E-09 |
| 5 | 3 | 2  | 10.8 | 8.1 | 28.0 | 5.4E-09 | 4.4E-09 | 5.9E-09 |
| 5 | 3 | 4  | 9.2  | 6.9 | 23.0 | 3.6E-09 | 2.8E-09 | 4.0E-09 |
| 5 | 3 | 5  | 9.7  | 6.8 | 24.1 | 4.1E-09 | 3.2E-09 | 4.4E-09 |
| 5 | 3 | 6  | 9.6  | 6.6 | 23.7 | 3.7E-09 | 2.9E-09 | 4.1E-09 |
| 5 | 3 | 8  | 11.5 | 8.9 | 18.0 | 3.9E-09 | 3.2E-09 | 4.2E-09 |
| 5 | 3 | 9  | 10.2 | 7.5 | 20.2 | 3.6E-09 | 2.9E-09 | 4.0E-09 |
| 5 | 3 | 11 | 11.1 | 7.7 | 23.6 | 4.6E-09 | 3.7E-09 | 5.0E-09 |
| 5 | 3 | 12 | 9.9  | 6.7 | 21.4 | 3.7E-09 | 2.9E-09 | 4.0E-09 |
| 5 | 3 | 13 | 9.5  | 6.7 | 17.1 | 2.7E-09 | 2.1E-09 | 2.9E-09 |
| 5 | 3 | 14 | 9.4  | 6.8 | 14.1 | 2.4E-09 | 1.9E-09 | 2.6E-09 |
| 5 | 3 | 15 | 11.3 | 8.0 | 20.3 | 4.2E-09 | 3.4E-09 | 4.5E-09 |
| 5 | 3 | 16 | 9.3  | 6.4 | 18.2 | 2.8E-09 | 2.2E-09 | 3.1E-09 |
| 5 | 3 | 17 | 10.7 | 7.6 | 19.7 | 3.6E-09 | 2.9E-09 | 3.9E-09 |
| 5 | 3 | 18 | 11.1 | 8.3 | 18.2 | 3.7E-09 | 3.0E-09 | 4.0E-09 |
| 5 | 3 | 22 | 9.0  | 7.2 | 8.9  | 1.4E-09 | 1.1E-09 | 1.6E-09 |
| 7 | 1 | 1  | 11.3 | 8.7 | 22.1 | 4.7E-09 | 3.8E-09 | 5.0E-09 |
| 7 | 1 | 2  | 10.0 | 6.8 | 30.9 | 5.1E-09 | 4.1E-09 | 5.6E-09 |
| 7 | 1 | 3  | 9.4  | 7.1 | 30.0 | 5.0E-09 | 3.9E-09 | 5.4E-09 |
| 7 | 1 | 4  | 11.1 | 8.2 | 24.4 | 5.0E-09 | 4.1E-09 | 5.4E-09 |
| 7 | 1 | 6  | 10.5 | 7.9 | 26.1 | 4.8E-09 | 3.8E-09 | 5.2E-09 |
| 7 | 1 | 8  | 9.2  | 7.1 | 17.6 | 2.9E-09 | 2.2E-09 | 3.1E-09 |
| 7 | 1 | 9  | 10.5 | 7.8 | 26.2 | 4.9E-09 | 3.9E-09 | 5.3E-09 |



|   |   |    |      |     |      |         |         |         |
|---|---|----|------|-----|------|---------|---------|---------|
| 7 | 1 | 10 | 9.7  | 7.0 | 21.6 | 3.7E-09 | 2.9E-09 | 4.1E-09 |
| 7 | 1 | 12 | 8.9  | 5.9 | 24.5 | 3.4E-09 | 2.6E-09 | 3.7E-09 |
| 7 | 1 | 13 | 10.9 | 7.7 | 24.1 | 4.5E-09 | 3.6E-09 | 4.9E-09 |
| 7 | 1 | 14 | 8.3  | 5.2 | 18.2 | 2.3E-09 | 1.8E-09 | 2.6E-09 |
| 7 | 1 | 15 | 11.0 | 7.9 | 26.2 | 5.0E-09 | 4.1E-09 | 5.5E-09 |
| 7 | 1 | 16 | 11.0 | 8.0 | 20.6 | 4.0E-09 | 3.2E-09 | 4.4E-09 |
| 7 | 1 | 17 | 8.3  | 6.2 | 11.0 | 1.6E-09 | 1.2E-09 | 1.8E-09 |
| 7 | 1 | 18 | 9.8  | 7.0 | 17.9 | 3.0E-09 | 2.4E-09 | 3.3E-09 |
| 7 | 1 | 19 | 8.9  | 6.4 | 16.0 | 2.4E-09 | 1.9E-09 | 2.6E-09 |
| 7 | 1 | 20 | 9.8  | 6.0 | 32.8 | 4.9E-09 | 3.9E-09 | 5.4E-09 |
| 7 | 1 | 21 | 11.5 | 8.6 | 22.5 | 4.6E-09 | 3.7E-09 | 5.0E-09 |
| 7 | 1 | 22 | 10.8 | 7.7 | 21.2 | 4.0E-09 | 3.2E-09 | 4.3E-09 |
| 7 | 2 | 5  | 11.9 | 8.4 | 30.3 | 6.4E-09 | 5.2E-09 | 6.9E-09 |
| 7 | 2 | 6  | 10.7 | 7.9 | 22.6 | 4.2E-09 | 3.3E-09 | 4.5E-09 |
| 7 | 2 | 7  | 11.6 | 8.3 | 32.0 | 6.6E-09 | 5.3E-09 | 7.2E-09 |
| 7 | 2 | 10 | 13.0 | 9.8 | 33.3 | 8.3E-09 | 6.8E-09 | 8.9E-09 |
| 7 | 2 | 11 | 11.6 | 8.0 | 30.0 | 6.1E-09 | 4.9E-09 | 6.6E-09 |
| 7 | 2 | 12 | 9.4  | 6.5 | 19.7 | 3.0E-09 | 2.3E-09 | 3.3E-09 |
| 7 | 2 | 13 | 11.3 | 8.0 | 26.2 | 5.2E-09 | 4.2E-09 | 5.6E-09 |
| 7 | 2 | 15 | 10.1 | 7.0 | 26.4 | 4.4E-09 | 3.5E-09 | 4.8E-09 |
| 7 | 2 | 16 | 10.1 | 7.4 | 26.2 | 4.5E-09 | 3.6E-09 | 4.9E-09 |
| 7 | 2 | 17 | 10.4 | 8.0 | 21.8 | 3.9E-09 | 3.1E-09 | 4.3E-09 |
| 7 | 2 | 18 | 11.2 | 8.0 | 27.9 | 5.4E-09 | 4.4E-09 | 5.9E-09 |
| 7 | 2 | 21 | 10.9 | 7.8 | 27.6 | 5.2E-09 | 4.2E-09 | 5.7E-09 |
| 7 | 2 | 22 | 10.6 | 7.2 | 28.7 | 5.0E-09 | 3.9E-09 | 5.4E-09 |
| 7 | 2 | 23 | 8.8  | 6.1 | 15.6 | 2.3E-09 | 1.8E-09 | 2.5E-09 |
| 9 | 1 | 3  | 10.6 | 7.4 | 24.9 | 4.6E-09 | 3.7E-09 | 5.0E-09 |
| 9 | 1 | 4  | 9.8  | 6.8 | 23.9 | 3.9E-09 | 3.1E-09 | 4.3E-09 |
| 9 | 1 | 5  | 9.4  | 6.5 | 26.9 | 4.0E-09 | 3.1E-09 | 4.4E-09 |
| 9 | 1 | 6  | 10.7 | 8.1 | 25.8 | 5.0E-09 | 4.0E-09 | 5.4E-09 |
| 9 | 1 | 7  | 8.8  | 6.5 | 15.7 | 2.3E-09 | 1.7E-09 | 2.5E-09 |
| 9 | 1 | 12 | 9.8  | 5.4 | 33.4 | 5.0E-09 | 3.9E-09 | 5.5E-09 |
| 9 | 1 | 13 | 9.7  | 7.4 | 16.8 | 2.7E-09 | 2.1E-09 | 3.0E-09 |
| 9 | 1 | 15 | 10.8 | 7.6 | 24.7 | 4.8E-09 | 3.8E-09 | 5.2E-09 |
| 9 | 1 | 17 | 10.2 | 6.4 | 33.6 | 5.6E-09 | 4.4E-09 | 6.1E-09 |
| 9 | 1 | 18 | 9.9  | 7.1 | 22.7 | 3.7E-09 | 2.9E-09 | 4.1E-09 |
| 9 | 1 | 19 | 9.6  | 6.7 | 21.7 | 3.4E-09 | 2.7E-09 | 3.7E-09 |

|   |   |    |      |      |      |         |         |         |
|---|---|----|------|------|------|---------|---------|---------|
| 9 | 1 | 20 | 10.4 | 7.9  | 20.5 | 3.8E-09 | 3.1E-09 | 4.2E-09 |
| 9 | 1 | 25 | 9.6  | 6.7  | 23.0 | 3.6E-09 | 2.9E-09 | 4.0E-09 |
| 9 | 1 | 28 | 10.0 | 6.7  | 29.5 | 4.7E-09 | 3.7E-09 | 5.2E-09 |
| 9 | 1 | 31 | 10.7 | 7.6  | 23.9 | 4.6E-09 | 3.7E-09 | 5.0E-09 |
| 9 | 1 | 32 | 11.0 | 7.6  | 30.9 | 6.0E-09 | 4.8E-09 | 6.5E-09 |
| 9 | 1 | 34 | 9.4  | 6.5  | 22.1 | 3.4E-09 | 2.6E-09 | 3.7E-09 |
| 9 | 1 | 35 | 11.8 | 9.6  | 31.7 | 7.3E-09 | 6.0E-09 | 7.9E-09 |
| 9 | 1 | 36 | 10.1 | 7.2  | 25.8 | 4.5E-09 | 3.6E-09 | 4.9E-09 |
| 9 | 1 | 41 | 10.6 | 7.2  | 28.4 | 5.0E-09 | 3.9E-09 | 5.4E-09 |
| 9 | 1 | 44 | 9.3  | 5.3  | 31.2 | 4.2E-09 | 3.3E-09 | 4.7E-09 |
| 9 | 1 | 45 | 9.3  | 4.6  | 24.0 | 3.0E-09 | 2.3E-09 | 3.4E-09 |
| 9 | 1 | 46 | 10.0 | 6.5  | 33.0 | 5.4E-09 | 4.2E-09 | 5.9E-09 |
| 9 | 2 | 1  | 9.7  | 7.0  | 16.6 | 2.7E-09 | 2.1E-09 | 3.0E-09 |
| 9 | 2 | 2  | 12.4 | 10.0 | 23.7 | 5.6E-09 | 4.6E-09 | 6.0E-09 |
| 9 | 2 | 3  | 9.7  | 7.2  | 14.7 | 2.5E-09 | 2.0E-09 | 2.7E-09 |
| 9 | 2 | 6  | 10.6 | 7.5  | 21.4 | 4.0E-09 | 3.2E-09 | 4.4E-09 |
| 9 | 2 | 7  | 11.5 | 8.4  | 17.8 | 3.7E-09 | 3.0E-09 | 4.0E-09 |
| 9 | 2 | 8  | 10.6 | 8.1  | 15.3 | 3.0E-09 | 2.4E-09 | 3.3E-09 |
| 9 | 2 | 11 | 10.2 | 7.8  | 19.4 | 3.6E-09 | 2.9E-09 | 3.9E-09 |
| 9 | 2 | 12 | 9.7  | 7.3  | 16.7 | 2.8E-09 | 2.2E-09 | 3.1E-09 |
| 9 | 2 | 13 | 11.4 | 8.9  | 18.1 | 3.9E-09 | 3.2E-09 | 4.2E-09 |
| 9 | 2 | 15 | 11.4 | 8.8  | 21.8 | 4.6E-09 | 3.7E-09 | 5.0E-09 |
| 9 | 2 | 19 | 9.6  | 7.0  | 15.9 | 2.7E-09 | 2.1E-09 | 2.9E-09 |
| 9 | 2 | 21 | 11.4 | 8.5  | 23.1 | 4.8E-09 | 3.9E-09 | 5.2E-09 |
| 9 | 2 | 22 | 10.4 | 7.5  | 19.6 | 3.7E-09 | 3.0E-09 | 4.0E-09 |
| 9 | 2 | 23 | 10.4 | 8.6  | 11.5 | 2.2E-09 | 1.8E-09 | 2.4E-09 |
| 9 | 2 | 24 | 10.1 | 7.7  | 20.0 | 3.5E-09 | 2.8E-09 | 3.8E-09 |
| 9 | 2 | 25 | 10.8 | 7.9  | 19.7 | 3.9E-09 | 3.1E-09 | 4.2E-09 |
| 9 | 2 | 26 | 9.6  | 7.6  | 12.2 | 2.1E-09 | 1.7E-09 | 2.3E-09 |
| 9 | 2 | 27 | 10.4 | 7.3  | 17.9 | 3.2E-09 | 2.5E-09 | 3.5E-09 |
| 9 | 2 | 28 | 10.4 | 7.8  | 18.3 | 3.4E-09 | 2.8E-09 | 3.8E-09 |
| 9 | 2 | 29 | 9.6  | 7.7  | 9.6  | 1.7E-09 | 1.3E-09 | 1.8E-09 |
| 9 | 2 | 31 | 10.5 | 7.6  | 25.1 | 4.4E-09 | 3.5E-09 | 4.8E-09 |
| 9 | 2 | 32 | 10.5 | 7.8  | 14.4 | 2.7E-09 | 2.2E-09 | 3.0E-09 |
| 9 | 3 | 1  | 10.0 | 7.1  | 30.3 | 5.1E-09 | 4.0E-09 | 5.6E-09 |
| 9 | 3 | 2  | 10.4 | 7.4  | 26.7 | 4.8E-09 | 3.9E-09 | 5.3E-09 |
| 9 | 3 | 3  | 10.9 | 7.9  | 25.2 | 5.0E-09 | 4.0E-09 | 5.4E-09 |

|    |   |    |      |     |      |         |         |         |
|----|---|----|------|-----|------|---------|---------|---------|
| 9  | 3 | 6  | 9.9  | 6.8 | 28.8 | 4.9E-09 | 3.9E-09 | 5.4E-09 |
| 9  | 3 | 11 | 10.0 | 6.7 | 21.7 | 3.6E-09 | 2.8E-09 | 3.9E-09 |
| 9  | 3 | 16 | 10.4 | 7.7 | 19.3 | 3.5E-09 | 2.8E-09 | 3.8E-09 |
| 9  | 3 | 20 | 11.4 | 8.1 | 30.0 | 6.2E-09 | 5.0E-09 | 6.7E-09 |
| 9  | 3 | 21 | 10.1 | 6.6 | 24.8 | 4.0E-09 | 3.1E-09 | 4.4E-09 |
| 9  | 3 | 24 | 10.3 | 7.7 | 24.1 | 4.2E-09 | 3.3E-09 | 4.6E-09 |
| 9  | 3 | 26 | 11.4 | 8.0 | 31.6 | 6.2E-09 | 5.0E-09 | 6.7E-09 |
| 9  | 3 | 28 | 11.5 | 7.9 | 24.7 | 5.0E-09 | 4.1E-09 | 5.5E-09 |
| 9  | 3 | 29 | 11.5 | 7.6 | 25.9 | 5.2E-09 | 4.2E-09 | 5.6E-09 |
| 9  | 3 | 34 | 9.3  | 6.0 | 23.0 | 3.3E-09 | 2.5E-09 | 3.6E-09 |
| 9  | 3 | 35 | 10.5 | 7.0 | 21.0 | 3.7E-09 | 3.0E-09 | 4.1E-09 |
| 9  | 3 | 36 | 10.4 | 7.1 | 24.5 | 4.5E-09 | 3.6E-09 | 4.9E-09 |
| 9  | 3 | 37 | 9.5  | 6.2 | 20.6 | 3.1E-09 | 2.4E-09 | 3.4E-09 |
| 9  | 3 | 40 | 13.3 | 9.8 | 22.5 | 5.6E-09 | 4.7E-09 | 6.1E-09 |
| 9  | 3 | 41 | 10.5 | 8.0 | 16.9 | 3.3E-09 | 2.6E-09 | 3.6E-09 |
| 11 | 1 | 1  | 9.8  | 7.1 | 16.5 | 2.8E-09 | 2.2E-09 | 3.0E-09 |
| 11 | 1 | 5  | 12.7 | 8.4 | 20.4 | 4.6E-09 | 3.8E-09 | 5.0E-09 |
| 11 | 1 | 6  | 9.5  | 6.9 | 14.4 | 2.4E-09 | 1.9E-09 | 2.6E-09 |
| 11 | 1 | 7  | 10.2 | 7.6 | 15.4 | 2.8E-09 | 2.2E-09 | 3.1E-09 |
| 11 | 1 | 8  | 10.0 | 7.7 | 18.5 | 3.2E-09 | 2.6E-09 | 3.5E-09 |
| 11 | 1 | 10 | 9.5  | 6.9 | 11.5 | 1.8E-09 | 1.4E-09 | 2.0E-09 |
| 11 | 1 | 11 | 9.6  | 6.8 | 18.1 | 3.0E-09 | 2.3E-09 | 3.3E-09 |
| 11 | 1 | 14 | 12.4 | 9.5 | 31.4 | 7.3E-09 | 6.0E-09 | 7.8E-09 |
| 11 | 1 | 16 | 9.5  | 7.8 | 8.9  | 1.6E-09 | 1.2E-09 | 1.7E-09 |
| 11 | 2 | 1  | 10.6 | 7.6 | 24.7 | 4.6E-09 | 3.7E-09 | 5.0E-09 |
| 11 | 2 | 2  | 10.7 | 7.7 | 20.2 | 3.8E-09 | 3.1E-09 | 4.2E-09 |
| 11 | 2 | 3  | 9.7  | 6.7 | 25.6 | 4.1E-09 | 3.2E-09 | 4.5E-09 |
| 11 | 2 | 4  | 8.0  | 6.5 | 11.1 | 1.5E-09 | 1.2E-09 | 1.7E-09 |
| 11 | 2 | 5  | 9.9  | 7.3 | 13.4 | 2.4E-09 | 1.9E-09 | 2.6E-09 |
| 11 | 2 | 9  | 9.9  | 6.8 | 19.1 | 3.1E-09 | 2.5E-09 | 3.4E-09 |
| 11 | 2 | 11 | 9.6  | 7.0 | 12.4 | 2.1E-09 | 1.7E-09 | 2.3E-09 |
| 11 | 2 | 14 | 11.3 | 7.8 | 27.9 | 5.3E-09 | 4.3E-09 | 5.8E-09 |
| 11 | 2 | 16 | 10.2 | 7.3 | 20.0 | 3.4E-09 | 2.7E-09 | 3.8E-09 |
| 11 | 2 | 18 | 10.5 | 8.6 | 13.3 | 2.5E-09 | 2.0E-09 | 2.8E-09 |
| 11 | 2 | 19 | 9.4  | 6.2 | 17.8 | 2.6E-09 | 2.0E-09 | 2.9E-09 |
| 11 | 2 | 21 | 8.0  | 6.1 | 6.1  | 8.1E-10 | 6.2E-10 | 9.0E-10 |
| 11 | 2 | 22 | 11.4 | 8.4 | 22.9 | 4.7E-09 | 3.8E-09 | 5.1E-09 |

|    |   |    |      |     |      |         |         |         |
|----|---|----|------|-----|------|---------|---------|---------|
| 11 | 2 | 24 | 11.7 | 8.2 | 25.7 | 5.2E-09 | 4.2E-09 | 5.7E-09 |
| 11 | 2 | 29 | 10.6 | 7.7 | 19.2 | 3.5E-09 | 2.8E-09 | 3.8E-09 |
| 11 | 2 | 31 | 10.2 | 7.4 | 17.7 | 3.2E-09 | 2.5E-09 | 3.4E-09 |
| 13 | 1 | 1  | 12.0 | 9.1 | 30.6 | 6.8E-09 | 5.6E-09 | 7.4E-09 |
| 13 | 1 | 3  | 12.5 | 9.7 | 17.3 | 4.2E-09 | 3.4E-09 | 4.5E-09 |
| 13 | 1 | 5  | 11.7 | 7.6 | 19.3 | 3.8E-09 | 3.1E-09 | 4.1E-09 |
| 13 | 1 | 6  | 10.7 | 7.5 | 15.0 | 2.9E-09 | 2.3E-09 | 3.1E-09 |
| 13 | 1 | 7  | 11.8 | 8.9 | 21.3 | 4.6E-09 | 3.8E-09 | 5.0E-09 |
| 13 | 1 | 8  | 11.0 | 8.0 | 24.7 | 4.9E-09 | 3.9E-09 | 5.3E-09 |
| 13 | 1 | 12 | 12.0 | 8.9 | 23.9 | 5.3E-09 | 4.4E-09 | 5.8E-09 |
| 13 | 1 | 13 | 10.3 | 7.3 | 24.5 | 4.3E-09 | 3.4E-09 | 4.7E-09 |
| 13 | 1 | 14 | 11.8 | 8.8 | 23.7 | 5.0E-09 | 4.1E-09 | 5.4E-09 |
| 13 | 1 | 15 | 12.0 | 9.0 | 29.2 | 6.5E-09 | 5.3E-09 | 7.1E-09 |
| 13 | 1 | 16 | 12.2 | 9.4 | 26.3 | 5.6E-09 | 4.6E-09 | 6.1E-09 |
| 13 | 1 | 17 | 12.3 | 9.5 | 33.0 | 7.8E-09 | 6.4E-09 | 8.4E-09 |
| 13 | 1 | 18 | 11.3 | 8.6 | 19.9 | 4.3E-09 | 3.5E-09 | 4.6E-09 |
| 13 | 1 | 19 | 11.0 | 7.9 | 29.5 | 5.8E-09 | 4.7E-09 | 6.3E-09 |
| 13 | 2 | 3  | 9.4  | 6.6 | 22.3 | 3.5E-09 | 2.8E-09 | 3.9E-09 |
| 13 | 2 | 8  | 8.8  | 6.4 | 14.3 | 2.1E-09 | 1.6E-09 | 2.3E-09 |
| 13 | 2 | 9  | 9.7  | 7.3 | 20.8 | 3.4E-09 | 2.7E-09 | 3.7E-09 |
| 13 | 2 | 12 | 12.0 | 8.6 | 21.3 | 4.7E-09 | 3.8E-09 | 5.1E-09 |
| 13 | 2 | 15 | 9.6  | 6.8 | 13.6 | 2.2E-09 | 1.8E-09 | 2.5E-09 |
| 13 | 2 | 19 | 9.7  | 4.9 | 14.0 | 2.1E-09 | 1.6E-09 | 2.3E-09 |
| 13 | 2 | 20 | 11.2 | 8.2 | 22.5 | 4.4E-09 | 3.6E-09 | 4.8E-09 |
| 13 | 2 | 21 | 12.6 | 8.7 | 29.2 | 6.5E-09 | 5.3E-09 | 7.0E-09 |
| 13 | 2 | 22 | 11.5 | 8.6 | 21.0 | 4.4E-09 | 3.6E-09 | 4.8E-09 |
| 13 | 2 | 24 | 12.2 | 8.7 | 28.1 | 6.1E-09 | 4.9E-09 | 6.6E-09 |
| 13 | 2 | 25 | 12.2 | 8.2 | 21.7 | 4.7E-09 | 3.8E-09 | 5.1E-09 |
| 13 | 2 | 26 | 9.8  | 7.0 | 20.6 | 3.4E-09 | 2.7E-09 | 3.8E-09 |
| 13 | 2 | 27 | 10.3 | 7.8 | 19.0 | 3.3E-09 | 2.6E-09 | 3.6E-09 |
| 13 | 2 | 28 | 11.6 | 7.6 | 27.9 | 5.5E-09 | 4.4E-09 | 6.0E-09 |
| 13 | 2 | 29 | 9.3  | 6.4 | 14.6 | 2.4E-09 | 1.8E-09 | 2.6E-09 |
| 13 | 2 | 30 | 12.4 | 8.9 | 27.6 | 6.3E-09 | 5.2E-09 | 6.8E-09 |
| 15 | 1 | 9  | 12.4 | 9.3 | 20.8 | 4.8E-09 | 3.9E-09 | 5.2E-09 |
| 15 | 1 | 12 | 12.2 | 9.0 | 21.0 | 4.6E-09 | 3.8E-09 | 5.0E-09 |
| 15 | 1 | 13 | 9.4  | 7.5 | 7.3  | 1.2E-09 | 9.4E-10 | 1.3E-09 |
| 15 | 1 | 19 | 12.5 | 9.7 | 21.2 | 4.9E-09 | 4.0E-09 | 5.3E-09 |

|    |   |    |      |     |      |         |         |         |
|----|---|----|------|-----|------|---------|---------|---------|
| 15 | 1 | 20 | 11.4 | 8.1 | 21.2 | 4.3E-09 | 3.5E-09 | 4.6E-09 |
| 15 | 1 | 22 | 10.3 | 7.1 | 13.2 | 2.4E-09 | 1.9E-09 | 2.6E-09 |
| 15 | 1 | 23 | 11.7 | 8.8 | 19.1 | 4.2E-09 | 3.4E-09 | 4.6E-09 |
| 15 | 1 | 27 | 11.9 | 9.1 | 15.3 | 3.5E-09 | 2.8E-09 | 3.7E-09 |
| 15 | 1 | 28 | 13.5 | 8.9 | 23.5 | 6.0E-09 | 5.0E-09 | 6.4E-09 |
| 15 | 1 | 29 | 13.6 | 9.5 | 24.9 | 6.6E-09 | 5.5E-09 | 7.1E-09 |
| 15 | 1 | 30 | 12.1 | 7.4 | 24.8 | 5.3E-09 | 4.3E-09 | 5.7E-09 |
| 15 | 2 | 1  | 11.4 | 7.7 | 19.0 | 3.8E-09 | 3.1E-09 | 4.2E-09 |
| 15 | 2 | 3  | 10.2 | 6.8 | 13.1 | 2.3E-09 | 1.8E-09 | 2.5E-09 |
| 15 | 2 | 7  | 12.5 | 9.1 | 20.9 | 4.9E-09 | 4.0E-09 | 5.2E-09 |
| 15 | 2 | 8  | 9.3  | 7.2 | 8.4  | 1.4E-09 | 1.1E-09 | 1.6E-09 |
| 15 | 2 | 10 | 10.2 | 7.6 | 16.2 | 2.9E-09 | 2.3E-09 | 3.2E-09 |
| 15 | 2 | 12 | 11.3 | 8.4 | 25.2 | 5.1E-09 | 4.1E-09 | 5.5E-09 |
| 15 | 2 | 13 | 11.6 | 8.3 | 23.4 | 4.8E-09 | 3.9E-09 | 5.2E-09 |
| 15 | 2 | 18 | 11.6 | 6.1 | 25.2 | 4.7E-09 | 3.7E-09 | 5.1E-09 |
| 15 | 2 | 19 | 10.5 | 7.7 | 14.9 | 2.8E-09 | 2.3E-09 | 3.1E-09 |
| 15 | 2 | 20 | 12.3 | 8.6 | 25.3 | 5.3E-09 | 4.3E-09 | 5.8E-09 |
| 15 | 2 | 24 | 11.5 | 7.9 | 24.0 | 4.9E-09 | 4.0E-09 | 5.3E-09 |
| 17 | 1 | 3  | 10.5 | 8.4 | 7.3  | 1.5E-09 | 1.2E-09 | 1.6E-09 |
| 17 | 1 | 4  | 10.4 | 7.8 | 17.9 | 3.2E-09 | 2.5E-09 | 3.5E-09 |
| 17 | 1 | 7  | 13.2 | 9.2 | 25.0 | 6.2E-09 | 5.2E-09 | 6.7E-09 |
| 17 | 1 | 9  | 12.0 | 8.4 | 24.0 | 4.8E-09 | 3.9E-09 | 5.2E-09 |
| 17 | 1 | 10 | 12.2 | 9.0 | 23.1 | 5.1E-09 | 4.2E-09 | 5.6E-09 |
| 17 | 1 | 13 | 11.9 | 8.9 | 21.6 | 4.8E-09 | 3.9E-09 | 5.2E-09 |
| 17 | 2 | 5  | 9.8  | 7.3 | 12.0 | 2.1E-09 | 1.7E-09 | 2.3E-09 |
| 17 | 2 | 7  | 13.2 | 8.8 | 30.4 | 7.1E-09 | 5.8E-09 | 7.6E-09 |
| 17 | 2 | 8  | 9.9  | 6.8 | 13.9 | 2.4E-09 | 1.9E-09 | 2.6E-09 |
| 17 | 2 | 9  | 10.9 | 8.4 | 18.0 | 3.6E-09 | 2.9E-09 | 4.0E-09 |
| 17 | 2 | 10 | 10.8 | 7.3 | 23.6 | 4.3E-09 | 3.5E-09 | 4.7E-09 |
| 17 | 2 | 15 | 9.1  | 5.5 | 12.4 | 1.8E-09 | 1.4E-09 | 2.0E-09 |
| 17 | 2 | 16 | 10.6 | 4.9 | 27.6 | 4.6E-09 | 3.7E-09 | 5.1E-09 |
